# Supplementary material for: The air-gap PAD: a roll-to-roll-compatible fabrication method for paper microfluidics
Source: Royal Society of Chemistry journal article supplement (doi:10.1039/d2lc01164f), 2023-01-01

Supplemental Information for:

## The air-gap PAD: A roll-to-roll-compatible fabrication method for paper microfluidics

Rachel M. Roller,<sup>a</sup> Angela Rea,<sup>a</sup> and Marya Lieberman<sup>a\*</sup>

<sup>a</sup> University of Notre Dame, Department of Chemistry and Biochemistry, Notre Dame, IN, 46556

\* Corresponding author's email: [mliieberm@nd.edu](mailto:mliieberm@nd.edu)

### Table of Contents

|                |    |
|----------------|----|
| Figure S1..... | S1 |
| Figure S2..... | S2 |
| Figure S3..... | S2 |
| Figure S4..... | S2 |
| Figure S5..... | S3 |
| Table S1.....  | S3 |
| Figure S6..... | S4 |

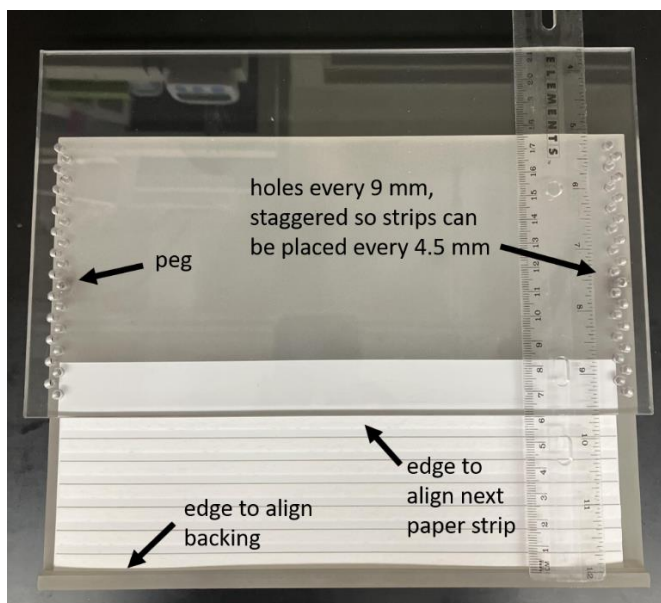

**Figure S1.** Pegboard for hand-fabrication of air-gap PADs. Ruler shown for scale.

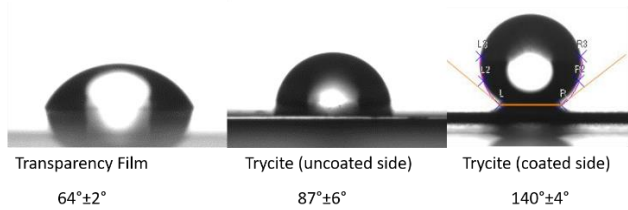

**Figure S2.** Contact angles for different backing types. Standard deviations from 9 replicate measurements.

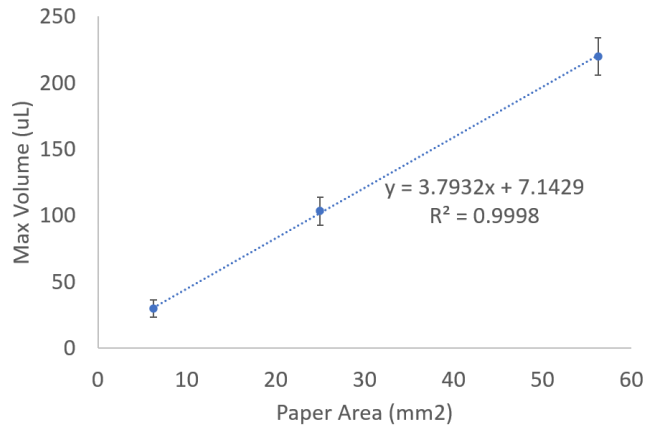

**Figure S3.** Air-gap device volume as a function of paper area. Error bars show standard deviations for six measurements.

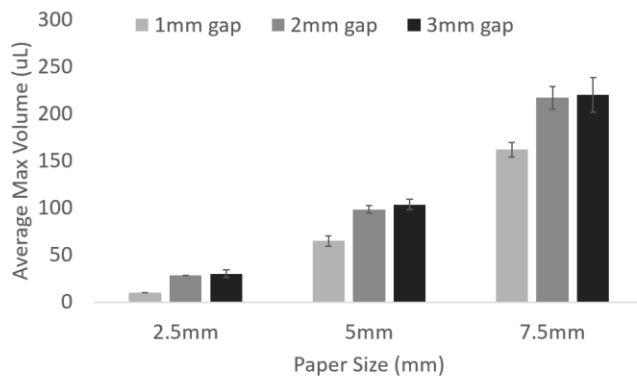

**Figure S4.** Air-gap device capacity by varying paper size and gap width. Transparency film was used as the backing. Error bars show standard deviation of six measurements.

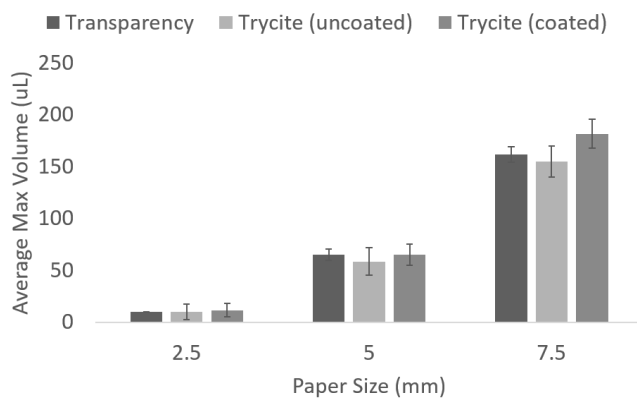

**Figure S5.** Air-gap device volume with different backing types. All measurements were taken with a 1mm air gap. Error bars show standard deviation of six measurements.

**Table S1.** Neural network classification accuracy as a function of mobile app operating system and background color.

| API                         | White background accuracy (%) | Black background accuracy (%) | iOS app accuracy (%)  | Android app accuracy (%) |
|-----------------------------|-------------------------------|-------------------------------|-----------------------|--------------------------|
| Amoxicillin                 | 63                            | 55                            | 68                    | 47                       |
| Ciprofloxacin               | 69                            | 75                            | 69                    | 75                       |
| Isoniazid                   | 76                            | 85                            | 75                    | 86                       |
| Pyrazinamide                | 29                            | 68                            | 42                    | 52                       |
| Rifampicin                  | 70                            | 63                            | 80                    | 55                       |
| <b>Average</b>              | 61                            | 69                            | 67                    | 62                       |
| <b>T-statistic (df = 4)</b> | <b>White vs black</b>         | 0.72                          | <b>iOS vs Android</b> | 0.48                     |
| <b>P-value (2-tailed)</b>   | <b>White vs black</b>         | 0.51                          | <b>iOS vs Android</b> | 0.66                     |

**Figure S6.** Air-gap 12-lane pharmaceutical-screening PAD images. Top row: amoxicillin, 2<sup>nd</sup> row: ciprofloxacin, 3<sup>rd</sup> row: isoniazid, 4<sup>th</sup> row: pyrazinamide, bottom row: rifampicin.

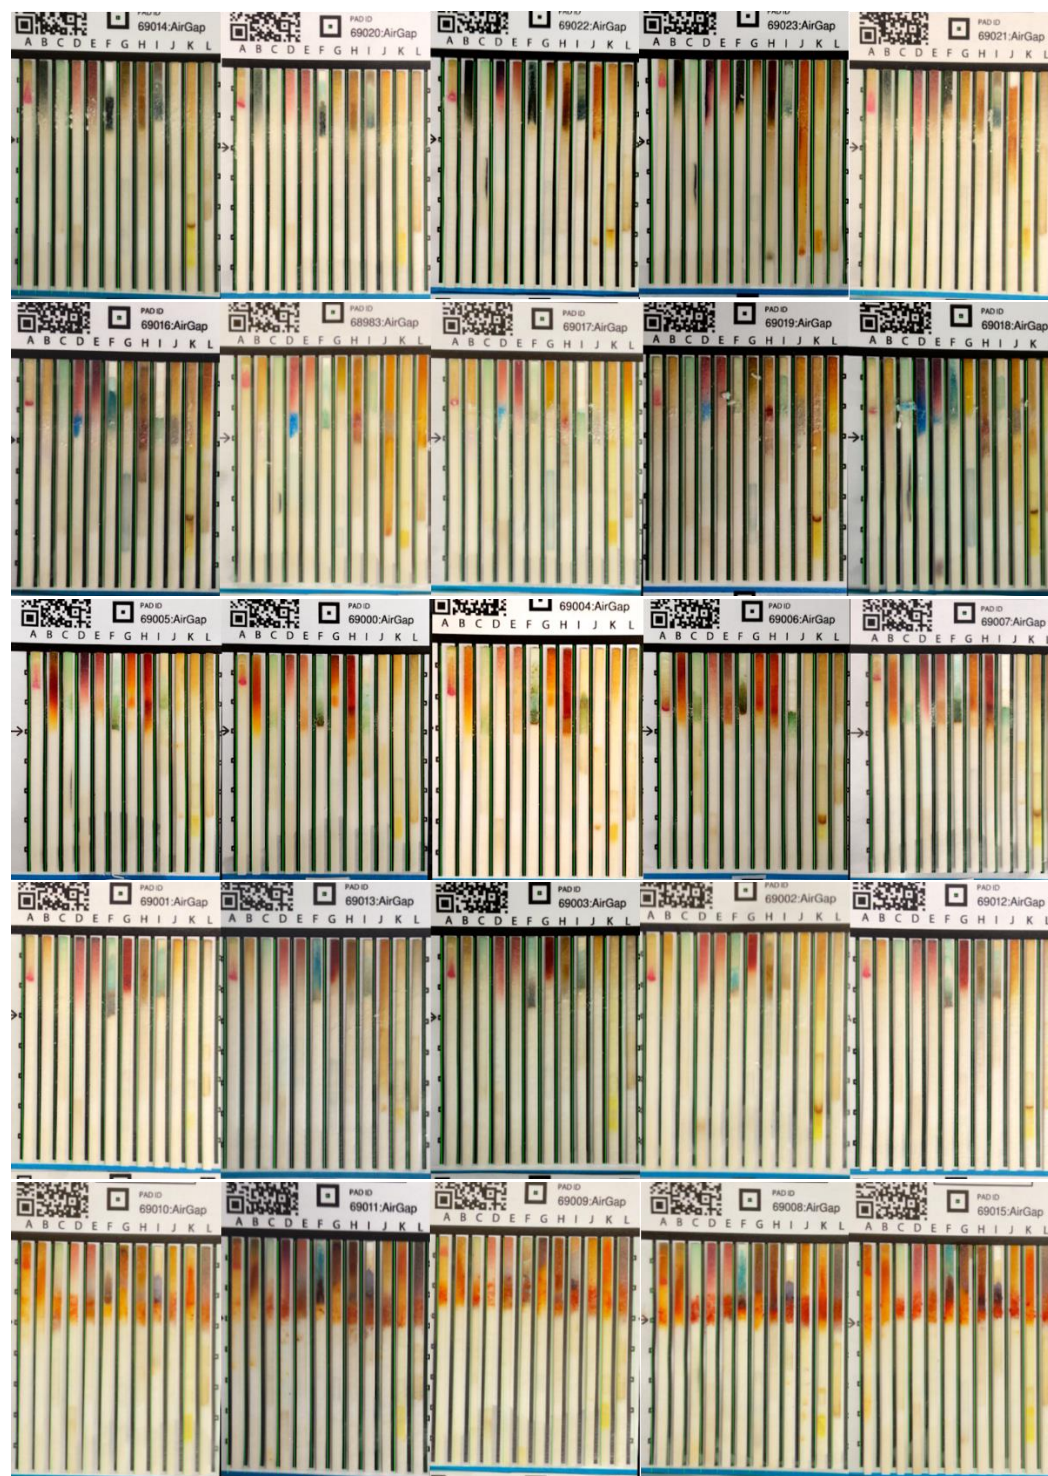

Supplement: d2lc01164f1.pdf [file d2lc01164f1.pdf]
