# Supplementary material for: The air-gap PAD: a roll-to-roll-compatible fabrication method for paper microfluidics
Source: Royal Society of Chemistry journal article supplement (doi:10.1039/d2lc01164f), 2023-01-01
Supplement: d2lc01164f2.pdf [file d2lc01164f2.pdf]

| Contact angles collected June 22 2021 |                   |                         |                                       |  |  |
|---------------------------------------|-------------------|-------------------------|---------------------------------------|--|--|
| Material                              | transparency film | Trycite (uncoated side) | Trycite (hydrophobically coated side) |  |  |
| contact angles                        | 68.4              | 71.9                    | 140.6                                 |  |  |
|                                       | 63.4              | 89.5                    | 140.2                                 |  |  |
|                                       | 64.2              | 85.2                    | 142.2                                 |  |  |
|                                       | 60.4              | 93                      | 131.3                                 |  |  |
|                                       | 61.5              | 95.1                    | 138.3                                 |  |  |
|                                       | 65.4              | 92.6                    | 137.2                                 |  |  |
|                                       | 62.3              | 86.5                    | 141.9                                 |  |  |
|                                       | 63.7              | 84.5                    | 143.7                                 |  |  |
|                                       | 63.4              | 82                      | 145.3                                 |  |  |
|                                       | 63.4              | 86                      | 140.8                                 |  |  |
|                                       | 63.6              | 86.6                    |                                       |  |  |
| Average                               | 63.60909091       | 86.62727273             | 140.15                                |  |  |
| stdev                                 | 2.076272884       | 6.337206152             | 3.9081823                             |  |  |

June 17 2021 testing volume of air-gap devices varying paper square size (2.5, 5, or 7.5 mm) and air gap (1, 2, or 3 mm). On overhead transparency film with Artgraphix adhesive and Alstrom 319.

| 7.5x7.5mm paper |               |              | 5x5mm paper   |        |               | 2.5x2.5mm paper |               |        |     |              |              |
|-----------------|---------------|--------------|---------------|--------|---------------|-----------------|---------------|--------|-----|--------------|--------------|
| gap             | 1mm           | 2mm          | 3mm           | gap    | 1mm           | 2mm             | 3mm           | gap    | 1mm | 2mm          | 3mm          |
| volume (uL)     | 150           | 210          | 210           | volume | 60            | 90              | 100           | volume | 10  | 20           | 20           |
| *               | 170           | 230          | 230           |        | 60            | 90              | 100           |        | 10  | 40           | 40           |
|                 | 160           | 200          | 200           |        | 70            | 110             | 90            |        | 10  | 30           | 30           |
|                 | 160           | 230          | 220           |        | 70            | 110             | 110           |        | 10  | 30           | 30           |
|                 | 170           | 230          | 240           |        | 60            | 80              | 100           |        | 10  | 20           | 30           |
|                 | 160           | 200          | 220           |        | 70            | 110             | 120           |        | 10  | 30           | 30           |
| Average         | 161.6666667   | 216.6666667  | 220           |        | 65            | 98.33333333     | 103.3333333   |        | 10  | 28.33333333  | 30           |
| Standard deviat | 7.527726527   | 15.05545305  | 14.14213562   |        | 5.477225575   | 13.29160136     | 10.32795559   |        | 0   | 7.527726527  | 6.32455532   |
| rsd             | 0.04656325687 | 0.0694867064 | 0.06428243465 |        | 0.08426500885 | 0.1351688274    | 0.09994795732 |        | 0   | 0.2656844657 | 0.2108185107 |

| June 17 2021 volume testing |               |               |               |                 |               |               |               |                 |              |              |              |
|-----------------------------|---------------|---------------|---------------|-----------------|---------------|---------------|---------------|-----------------|--------------|--------------|--------------|
| Trycite uncoated side       |               |               |               |                 |               |               |               |                 |              |              |              |
| 7.5x7.5                     |               |               | 5x5           |                 |               | 2.5x2.5       |               |                 |              |              |              |
| gap                         | 1mm           | 2mm           | 3mm           | gap             | 1mm           | 2mm           | 3mm           | gap             | 1mm          | 2mm          | 3mm          |
| volume (uL)                 | 140           | 200           | 220           | volume          | 60            | 100           | 120           | volume          | 10           | 20           | 20           |
|                             | 140           | 200           | 220           |                 | 50            | 90            | 100           |                 | 10           | 30           | 30           |
|                             | 160           | 200           | 200           |                 | 60            | 90            | 110           |                 | 10           | 20           | 30           |
|                             | 170           | 210           | 240           |                 | 60            | 80            | 120           |                 | 10           | 30           | 20           |
|                             | 160           | 190           | 210           |                 | 60            | 100           | 130           |                 | 10           | 20           | 30           |
|                             | 160           | 220           | 250           |                 | 60            | 90            | 120           |                 | 10           | 20           | 30           |
|                             |               |               |               |                 |               |               |               |                 |              |              |              |
| Average                     | 155           | 203.3333333   | 223.3333333   | Average         | 58.33333333   | 91.66666667   | 116.6666667   | Average         | 10           | 23.33333333  | 26.66666667  |
| Standard deviat             | 12.24744871   | 10.32795559   | 18.61898673   | Standard deviat | 4.082482905   | 7.527726527   | 10.32795559   | Standard deviat | 0            | 5.163977795  | 5.163977795  |
| rsd                         | 0.07901579815 | 0.05079322421 | 0.08336859728 | rsd             | 0.06998542122 | 0.08212065302 | 0.08852533363 | rsd             | 0            | 0.2213133341 | 0.1936491673 |
|                             |               |               |               |                 |               |               |               |                 |              |              |              |
| Trycite coated side         |               |               |               |                 |               |               |               |                 |              |              |              |
| 7.5x7.5                     |               |               | 5x5           |                 |               | 2.5x2.5       |               |                 |              |              |              |
| gap                         | 1mm           | 2mm           | 3mm           | gap             | 1mm           | 2mm           | 3mm           | gap             | 1mm          | 2mm          | 3mm          |
| volume (uL)                 | 190           | 210           | 220           | volume          | 60            | 110           | 120           | volume          | 10           | 20           | 30           |
|                             | 190           | 230           | 240           |                 | 70            | 100           | 150           |                 | 10           | 30           | 30           |
|                             | 210           | 210           | 230           |                 | 60            | 110           | 130           |                 | 10           | 20           | 30           |
|                             | 160           | 250           | 220           |                 | 60            | 110           | 140           |                 | 10           | 20           | 30           |
|                             | 170           | 230           | 200           |                 | 70            | 100           | 120           |                 | 20           | 20           | 30           |
|                             | 170           | 250           | 200           |                 | 70            | 100           | 130           |                 | 10           | 20           | 30           |
|                             |               |               |               |                 |               |               |               |                 |              |              |              |
| Average                     | 181.6666667   | 230           | 218.3333333   | Average         | 65            | 105           | 131.6666667   | Average         | 11.66666667  | 21.66666667  | 30           |
| Standard deviat             | 18.34847859   | 17.88854382   | 16.02081979   | Standard deviat | 5.477225575   | 5.477225575   | 11.69045194   | Standard deviat | 4.082482905  | 4.082482905  | 0            |
| rsd                         | 0.1010007996  | 0.07777627748 | 0.07337780055 | rsd             | 0.08426500885 | 0.0521640531  | 0.08878824262 | rsd             | 0.3499271061 | 0.1884222879 | 0            |

Data collected August 11, 2022 by RMR. iPhone SE camera, no filters or lighting adjustments. 0.096 M NaOH analyte, either phenolphthalein, 40 uL analyte. On titrators spotted with 5uL of TsOH. Wax printed titrators used black wax. Air gap used laser cut Alhstrom 319 paper and Artgraphix adhesive on hydrophobic tritite from Serim, cut so paper squares were 5x5mm. Phenolphthalein 30x30 square in imageJ

| Air Gap 1 |     |     |     | Air Gap 2 |     |     |     | Air Gap 3 |     |     |     | Air Gap 4 |     |        |        | average air gap |   |   |   |
|-----------|-----|-----|-----|-----------|-----|-----|-----|-----------|-----|-----|-----|-----------|-----|--------|--------|-----------------|---|---|---|
| TsOH      | R   | G   | B   | R         | G   | B   | R   | G         | B   | R   | G   | B         | R   | G      | B      | TsOH            | R | G | B |
| 0         | 234 | 195 | 195 | 229       | 194 | 190 | 230 | 203       | 194 | 225 | 185 | 183       | 0   | 229.5  | 194.25 | 190.5           |   |   |   |
| 0.1       | 232 | 188 | 197 | 232       | 186 | 196 | 227 | 182       | 187 | 226 | 181 | 186       | 0.1 | 229.25 | 184.25 | 191.5           |   |   |   |
| 0.2       | 230 | 183 | 196 | 231       | 183 | 199 | 229 | 179       | 188 | 227 | 177 | 185       | 0.2 | 229.25 | 180.5  | 192             |   |   |   |
| 0.3       | 229 | 178 | 195 | 229       | 178 | 197 | 230 | 178       | 191 | 226 | 174 | 186       | 0.3 | 228.5  | 177    | 192.25          |   |   |   |
| 0.4       | 229 | 175 | 196 | 230       | 175 | 198 | 230 | 174       | 189 | 226 | 172 | 186       | 0.4 | 228.75 | 174    | 192.25          |   |   |   |
| 0.5       | 229 | 172 | 195 | 230       | 172 | 197 | 230 | 173       | 190 | 226 | 169 | 185       | 0.5 | 228.75 | 171.5  | 191.75          |   |   |   |
| 0.6       | 224 | 208 | 199 | 229       | 214 | 205 | 228 | 207       | 200 | 223 | 209 | 194       | 0.6 | 226    | 209.5  | 199.5           |   |   |   |
| 0.7       | 226 | 221 | 201 | 228       | 224 | 204 | 228 | 221       | 203 | 220 | 213 | 194       | 0.7 | 225.5  | 219.75 | 200.5           |   |   |   |
| 0.8       | 228 | 223 | 203 | 228       | 223 | 203 | 227 | 221       | 202 | 222 | 215 | 195       | 0.8 | 226.25 | 220.5  | 200.75          |   |   |   |
| 0.9       | 229 | 225 | 206 | 229       | 224 | 205 | 228 | 223       | 203 | 223 | 216 | 197       | 0.9 | 227.25 | 222    | 202.75          |   |   |   |
| 1         | 230 | 226 | 206 | 227       | 222 | 202 | 229 | 223       | 204 | 224 | 218 | 198       | 1   | 227.5  | 222.25 | 202.5           |   |   |   |
| 1.5       | 233 | 228 | 208 | 233       | 228 | 209 | 229 | 223       | 203 | 226 | 219 | 197       | 1.5 | 230.25 | 224.5  | 204.25          |   |   |   |
| 3         | 235 | 229 | 210 | 236       | 229 | 211 | 235 | 228       | 209 | 229 | 221 | 198       | 3   | 233.75 | 226.75 | 207             |   |   |   |

| Wax 1 |     |     |     | Wax 2 |     |     |     | wax 3 |     |     |     | Average wax |     |     |        |        |        |
|-------|-----|-----|-----|-------|-----|-----|-----|-------|-----|-----|-----|-------------|-----|-----|--------|--------|--------|
| TsOH  | R   | G   | B   | TsOH  | R   | G   | B   | TsOH  | R   | G   | B   | TsOH        | R   | G   | B      |        |        |
| 0     | 168 | 147 | 156 | 0     | 164 | 152 | 156 | 166   | 146 | 155 | 165 | 145         | 154 | 0   | 165.75 | 147.5  | 155.25 |
| 0.1   | 166 | 142 | 154 | 0.1   | 169 | 149 | 158 | 157   | 135 | 147 | 154 | 133         | 145 | 0.1 | 161.5  | 139.75 | 151    |
| 0.2   | 165 | 140 | 153 | 0.2   | 159 | 140 | 150 | 143   | 124 | 136 | 156 | 134         | 146 | 0.2 | 155.75 | 134.5  | 146.25 |
| 0.3   | 169 | 143 | 154 | 0.3   | 157 | 137 | 148 | 151   | 129 | 141 | 146 | 125         | 136 | 0.3 | 155.75 | 133.5  | 144.75 |
| 0.4   | 149 | 125 | 138 | 0.4   | 158 | 135 | 148 | 151   | 127 | 140 | 143 | 121         | 134 | 0.4 | 150.25 | 127    | 140    |
| 0.5   | 147 | 123 | 136 | 0.5   | 142 | 121 | 136 | 145   | 123 | 135 | 140 | 119         | 132 | 0.5 | 143.5  | 121.5  | 134.75 |
| 0.6   | 149 | 121 | 136 | 0.6   | 142 | 126 | 136 | 146   | 126 | 135 | 146 | 127         | 137 | 0.6 | 145.75 | 125    | 138    |
| 0.7   | 140 | 138 | 135 | 0.7   | 142 | 142 | 140 | 144   | 143 | 139 | 144 | 143         | 139 | 0.7 | 142.5  | 141.5  | 138.25 |
| 0.8   | 132 | 131 | 129 | 0.8   | 146 | 146 | 144 | 146   | 145 | 140 | 149 | 148         | 144 | 0.8 | 143.25 | 142.5  | 139.25 |
| 0.9   | 143 | 142 | 138 | 0.9   | 142 | 142 | 140 | 144   | 143 | 138 | 164 | 161         | 156 | 0.9 | 148.25 | 147    | 143    |
| 1     | 149 | 146 | 141 | 1     | 149 | 149 | 147 | 147   | 146 | 140 | 155 | 152         | 149 | 1   | 150    | 148.25 | 144.25 |
| 1.5   | 146 | 145 | 140 | 1.5   | 148 | 147 | 146 | 149   | 147 | 142 | 147 | 146         | 143 | 1.5 | 147.5  | 146.25 | 142.75 |
| 3     | 125 | 124 | 120 | 3     | 148 | 148 | 148 | 150   | 147 | 141 | 152 | 151         | 147 | 3   | 143.75 | 142.5  | 139    |

40 uL 0.096M NaOH, 5uL listed TsOH. Data collected 12.20.22.

| Roll-to-roll titrators |              |              |              |              |           |             |
|------------------------|--------------|--------------|--------------|--------------|-----------|-------------|
| TsOH                   | G titrator 1 | G titrator 2 | G titrator 3 | G titrator 4 | Average G | stdev G     |
| 0                      | 190          | 181          | 178          | 171          | 180       | 7.874007874 |
| 0.1                    | 185          | 179          | 176          | 171          | 177.75    | 5.852349955 |
| 0.2                    | 184          | 179          | 175          | 170          | 177       | 5.944184833 |
| 0.3                    | 182          | 176          | 173          | 170          | 175.25    | 5.123475383 |
| 0.4                    | 200          | 193          | 188          | 187          | 192       | 5.944184833 |
| 0.5                    | 190          | 188          | 181          | 186          | 186.25    | 3.862210075 |
| 0.6                    | 199          | 198          | 191          | 194          | 195.5     | 3.696845502 |
| 0.7                    | 230          | 227          | 222          | 218          | 224.25    | 5.315072906 |
| 0.8                    | 230          | 227          | 223          | 218          | 224.5     | 5.196152423 |
| 0.9                    | 229          | 226          | 223          | 221          | 224.75    | 3.5         |
| 1                      | 228          | 228          | 222          | 222          | 225       | 3.464101615 |
| 1.5                    | 231          | 228          | 226          | 221          | 226.5     | 4.203173404 |
| 3                      | 233          | 230          | 228          | 224          | 228.75    | 3.774917218 |

| Pad id | Api (actual)  | Tester 1      | Tester 2      | Tester 3      | Tester 4      | Tester 5      |
|--------|---------------|---------------|---------------|---------------|---------------|---------------|
| 69014  | Amoxicillin   | Amoxicillin   | Amoxicillin   | Amoxicillin   | Amoxicillin   | Amoxicillin   |
| 69020  | Amoxicillin   | Amoxicillin   | Amoxicillin   | Amoxicillin   | Amoxicillin   | Amoxicillin   |
| 69021  | Amoxicillin   | Amoxicillin   | Amoxicillin   | Amoxicillin   | Amoxicillin   | Amoxicillin   |
| 69022  | Amoxicillin   | Amoxicillin   | Amoxicillin   | Amoxicillin   | Amoxicillin   | Amoxicillin   |
| 69023  | Amoxicillin   | Amoxicillin   | Amoxicillin   | Amoxicillin   | Amoxicillin   | Amoxicillin   |
| 68983  | Ciprofloxacin | Ciprofloxacin | Ciprofloxacin | Ciprofloxacin | Ciprofloxacin | Ciprofloxacin |
| 69016  | Ciprofloxacin | Ciprofloxacin | Ciprofloxacin | Ciprofloxacin | Ciprofloxacin | Ciprofloxacin |
| 69017  | Ciprofloxacin | Ciprofloxacin | Ciprofloxacin | Ciprofloxacin | Ciprofloxacin | Ciprofloxacin |
| 69018  | Ciprofloxacin | Ciprofloxacin | Ciprofloxacin | Ciprofloxacin | Ciprofloxacin | Ciprofloxacin |
| 69019  | Ciprofloxacin | Ciprofloxacin | Ciprofloxacin | Ciprofloxacin | Ciprofloxacin | Ciprofloxacin |
| 69000  | Isoniazid     | Isoniazid     | Isoniazid     | Isoniazid     | Isoniazid     | Isoniazid     |
| 69004  | Isoniazid     | Isoniazid     | Isoniazid     | Isoniazid     | Isoniazid     | Isoniazid     |
| 69005  | Isoniazid     | Isoniazid     | Isoniazid     | Isoniazid     | Isoniazid     | Isoniazid     |
| 69006  | Isoniazid     | Isoniazid     | Isoniazid     | Isoniazid     | Isoniazid     | Isoniazid     |
| 69007  | Isoniazid     | Isoniazid     | Isoniazid     | Isoniazid     | Isoniazid     | Isoniazid     |
| 69001  | Pyrazinamide  | Pyrazinamide  | Rifampicin    | Pyrazinamide  | Pyrazinamide  | Pyrazinamide  |
| 69002  | Pyrazinamide  | Pyrazinamide  | Pyrazinamide  | Pyrazinamide  | Pyrazinamide  | Pyrazinamide  |
| 69003  | Pyrazinamide  | Pyrazinamide  | Rifampicin    | Pyrazinamide  | Pyrazinamide  | Pyrazinamide  |
| 69012  | Pyrazinamide  | Pyrazinamide  | Pyrazinamide  | Pyrazinamide  | Pyrazinamide  | Pyrazinamide  |
| 69013  | Pyrazinamide  | Pyrazinamide  | Isoniazid     | Pyrazinamide  | Pyrazinamide  | Pyrazinamide  |
| 69008  | Rifampicin    | Rifampicin    | Rifampicin    | Rifampicin    | Rifampicin    | Rifampicin    |
| 69009  | Rifampicin    | Rifampicin    | Isoniazid     | Rifampicin    | Rifampicin    | Rifampicin    |
| 69010  | Rifampicin    | Rifampicin    | Rifampicin    | Rifampicin    | Rifampicin    | Rifampicin    |
| 69011  | Rifampicin    | Rifampicin    | Rifampicin    | Rifampicin    | Rifampicin    | Rifampicin    |
| 69015  | Rifampicin    | Rifampicin    | Rifampicin    | Rifampicin    | Rifampicin    | Rifampicin    |

| PAD # | Database ID | Actual Drug | Predicted Drug (NN) | Confidence | Predicted correctly? |
|-------|-------------|-------------|---------------------|------------|----------------------|
| 69004 | 46441       | Isoniazid   | Isoniazid           | 0.66       | TRUE                 |
| 69004 | 46442       | Isoniazid   | Isoniazid           | 0.63       | TRUE                 |
| 69004 | 46443       | Isoniazid   | Isoniazid           | 0.54       | TRUE                 |
| 69004 | 46444       | Isoniazid   | Isoniazid           | 0.85       | TRUE                 |
| 69006 | 46445       | Isoniazid   | Isoniazid           | 0.76       | TRUE                 |
| 69006 | 46446       | Isoniazid   | Isoniazid           | 0.88       | TRUE                 |
| 69006 | 46447       | Isoniazid   | Isoniazid           | 0.94       | TRUE                 |
| 69006 | 46448       | Isoniazid   | Isoniazid           | 0.96       | TRUE                 |
| 69006 | 46449       | Isoniazid   | Isoniazid           | 0.86       | TRUE                 |
| 69006 | 46450       | Isoniazid   | Isoniazid           | 0.91       | TRUE                 |
| 69004 | 46451       | Isoniazid   | Isoniazid           | 0.82       | TRUE                 |
| 69004 | 46452       | Isoniazid   | Isoniazid           | 0.9        | TRUE                 |
| 69006 | 46453       | Isoniazid   | Isoniazid           | 0.89       | TRUE                 |
| 69007 | 46454       | Isoniazid   | Isoniazid           | 0.98       | TRUE                 |
| 69007 | 46455       | Isoniazid   | Isoniazid           | 0.98       | TRUE                 |
| 69007 | 46456       | Isoniazid   | Isoniazid           | 0.97       | TRUE                 |
| 69007 | 46457       | Isoniazid   | Isoniazid           | 0.78       | TRUE                 |
| 69007 | 46458       | Isoniazid   | Isoniazid           | 0.92       | TRUE                 |
| 69007 | 46459       | Isoniazid   | Isoniazid           | 0.97       | TRUE                 |
| 69006 | 46460       | Isoniazid   | Isoniazid           | 0.95       | TRUE                 |
| 69006 | 46461       | Isoniazid   | RIPE                | 0.78       | FALSE                |
| 69007 | 46462       | Isoniazid   | Isoniazid           | 0.97       | TRUE                 |
| 69007 | 46463       | Isoniazid   | Isoniazid           | 0.98       | TRUE                 |
| 69004 | 46464       | Isoniazid   | Isoniazid           | 0.88       | TRUE                 |
| 69006 | 46465       | Isoniazid   | Isoniazid           | 0.9        | TRUE                 |
| 69000 | 46466       | Isoniazid   | RIPE                | 0.79       | FALSE                |
| 69005 | 46467       | Isoniazid   | Epinephrine         | 0.59       | FALSE                |
| 69005 | 46468       | Isoniazid   | Isoniazid           | 0.88       | TRUE                 |
| 69000 | 46469       | Isoniazid   | RIPE                | 0.52       | FALSE                |

|       |       |              |              |      |       |
|-------|-------|--------------|--------------|------|-------|
| 69000 | 46470 | Isoniazid    | RIPE         | 0.48 | FALSE |
| 69005 | 46471 | Isoniazid    | Isoniazid    | 0.63 | TRUE  |
| 69005 | 46472 | Isoniazid    | Isoniazid    | 0.75 | TRUE  |
| 69000 | 46473 | Isoniazid    | RIPE         | 0.53 | FALSE |
| 69005 | 46474 | Isoniazid    | Isoniazid    | 0.95 | TRUE  |
| 69000 | 46475 | Isoniazid    | Isoniazid    | 0.59 | TRUE  |
| 69005 | 46476 | Isoniazid    | Isoniazid    | 0.79 | TRUE  |
| 69000 | 46477 | Isoniazid    | RIPE         | 0.39 | FALSE |
| 69000 | 46478 | Isoniazid    | RIPE         | 0.65 | FALSE |
| 69005 | 46479 | Isoniazid    | Isoniazid    | 0.96 | TRUE  |
| 69000 | 46480 | Isoniazid    | Isoniazid    | 0.56 | TRUE  |
| 69005 | 46481 | Isoniazid    | Isoniazid    | 0.92 | TRUE  |
| 69001 | 46482 | Pyrazinamide | RIPE         | 0.53 | FALSE |
| 69001 | 46483 | Pyrazinamide | RIPE         | 0.55 | FALSE |
| 69002 | 46484 | Pyrazinamide | RIPE         | 0.6  | FALSE |
| 69003 | 46485 | Pyrazinamide | Amoxicillin  | 0.37 | FALSE |
| 69012 | 46486 | Pyrazinamide | Ceftriaxone  | 0.41 | FALSE |
| 69013 | 46487 | Pyrazinamide | Pyrazinamide | 0.92 | TRUE  |
| 69012 | 46488 | Pyrazinamide | RIPE         | 0.45 | FALSE |
| 69013 | 46489 | Pyrazinamide | Amoxicillin  | 0.36 | FALSE |
| 69001 | 46490 | Pyrazinamide | Pyrazinamide | 0.62 | TRUE  |
| 69002 | 46491 | Pyrazinamide | Amoxicillin  | 0.88 | FALSE |
| 69003 | 46492 | Pyrazinamide | Amoxicillin  | 0.86 | FALSE |
| 69013 | 46493 | Pyrazinamide | Pyrazinamide | 0.48 | TRUE  |
| 69012 | 46494 | Pyrazinamide | Epinephrine  | 0.41 | FALSE |
| 69003 | 46495 | Pyrazinamide | RIPE         | 0.35 | FALSE |
| 69002 | 46496 | Pyrazinamide | RIPE         | 0.36 | FALSE |
| 69001 | 46497 | Pyrazinamide | Pyrazinamide | 0.94 | TRUE  |
| 69013 | 46498 | Pyrazinamide | Pyrazinamide | 0.47 | TRUE  |
| 69012 | 46499 | Pyrazinamide | Epinephrine  | 0.59 | FALSE |

|       |       |              |              |      |       |  |
|-------|-------|--------------|--------------|------|-------|--|
| 69003 | 46500 | Pyrazinamide | Amoxicillin  | 0.59 | FALSE |  |
| 69002 | 46501 | Pyrazinamide | Amoxicillin  | 0.81 | FALSE |  |
| 69001 | 46502 | Pyrazinamide | Pyrazinamide | 0.54 | TRUE  |  |
| 69001 | 46503 | Pyrazinamide | Pyrazinamide | 0.5  | TRUE  |  |
| 69002 | 46504 | Pyrazinamide | Epinephrine  | 0.63 | FALSE |  |
| 69012 | 46505 | Pyrazinamide | RIPE         | 0.53 | FALSE |  |
| 69013 | 46506 | Pyrazinamide | RIPE         | 0.43 | FALSE |  |
| 69013 | 46507 | Pyrazinamide | Pyrazinamide | 0.69 | TRUE  |  |
| 69012 | 46508 | Pyrazinamide | RIPE         | 0.76 | FALSE |  |
| 69003 | 46509 | Pyrazinamide | Pyrazinamide | 0.57 | TRUE  |  |
| 69002 | 46510 | Pyrazinamide | Pyrazinamide | 0.87 | TRUE  |  |
| 69001 | 46511 | Pyrazinamide | Pyrazinamide | 0.81 | TRUE  |  |
| 69001 | 46512 | Pyrazinamide | Pyrazinamide | 0.71 | TRUE  |  |
| 69002 | 46513 | Pyrazinamide | Pyrazinamide | 0.77 | TRUE  |  |
| 69003 | 46514 | Pyrazinamide | Pyrazinamide | 0.81 | TRUE  |  |
| 69012 | 46515 | Pyrazinamide | RIPE         | 0.33 | FALSE |  |
| 69013 | 46516 | Pyrazinamide | Pyrazinamide | 0.75 | TRUE  |  |
| 69003 | 46517 | Pyrazinamide | Pyrazinamide | 0.48 | TRUE  |  |
| 69012 | 46518 | Pyrazinamide | Pyrazinamide | 0.34 | TRUE  |  |
| 69013 | 46519 | Pyrazinamide | Pyrazinamide | 0.91 | TRUE  |  |
| 69002 | 46520 | Pyrazinamide | Pyrazinamide | 0.56 | TRUE  |  |
| 69001 | 46521 | Pyrazinamide | RIPE         | 0.5  | FALSE |  |
| 69003 | 46527 | Pyrazinamide | Rifampicin   | 0.98 | TRUE  |  |
| 69008 | 46522 | Rifampicin   | Rifampicin   | 0.98 | TRUE  |  |
| 69009 | 46523 | Rifampicin   | RIPE         | 0.72 | FALSE |  |
| 69010 | 46524 | Rifampicin   | Rifampicin   | 0.65 | TRUE  |  |
| 69011 | 46525 | Rifampicin   | Rifampicin   | 0.56 | TRUE  |  |
| 69015 | 46526 | Rifampicin   | Epinephrine  | 0.42 | FALSE |  |
| 69015 | 46528 | Rifampicin   | Epinephrine  | 0.73 | FALSE |  |
| 69010 | 46529 | Rifampicin   | Rifampicin   | 0.95 | TRUE  |  |



|       |       |            |             |      |       |  |
|-------|-------|------------|-------------|------|-------|--|
| 69011 | 46530 | Rifampicin | Rifampicin  | 0.95 | TRUE  |  |
| 69015 | 46531 | Rifampicin | Rifampicin  | 0.87 | TRUE  |  |
| 69015 | 46532 | Rifampicin | Rifampicin  | 0.88 | TRUE  |  |
| 69011 | 46533 | Rifampicin | Rifampicin  | 0.53 | TRUE  |  |
| 69010 | 46534 | Rifampicin | Rifampicin  | 0.39 | TRUE  |  |
| 69009 | 46535 | Rifampicin | RIPE        | 0.46 | FALSE |  |
| 69008 | 46536 | Rifampicin | Rifampicin  | 0.66 | TRUE  |  |
| 69015 | 46537 | Rifampicin | Rifampicin  | 0.91 | TRUE  |  |
| 69011 | 46538 | Rifampicin | Rifampicin  | 0.96 | TRUE  |  |
| 69010 | 46539 | Rifampicin | Rifampicin  | 0.96 | TRUE  |  |
| 69009 | 46540 | Rifampicin | Epinephrine | 0.63 | FALSE |  |
| 69008 | 46541 | Rifampicin | Rifampicin  | 0.99 | TRUE  |  |
| 69008 | 46542 | Rifampicin | Rifampicin  | 0.97 | TRUE  |  |
| 69009 | 46543 | Rifampicin | Epinephrine | 0.8  | FALSE |  |
| 69010 | 46544 | Rifampicin | Rifampicin  | 0.63 | TRUE  |  |
| 69011 | 46545 | Rifampicin | RIPE        | 0.96 | FALSE |  |
| 69015 | 46546 | Rifampicin | Rifampicin  | 0.71 | TRUE  |  |
| 69009 | 46547 | Rifampicin | Epinephrine | 0.65 | FALSE |  |
| 69008 | 46548 | Rifampicin | Rifampicin  | 0.98 | TRUE  |  |
| 69010 | 46549 | Rifampicin | Rifampicin  | 0.96 | TRUE  |  |
| 69011 | 46550 | Rifampicin | Rifampicin  | 0.55 | TRUE  |  |
| 69015 | 46551 | Rifampicin | Rifampicin  | 0.76 | TRUE  |  |
| 69008 | 46552 | Rifampicin | Rifampicin  | 0.97 | TRUE  |  |
| 69015 | 46553 | Rifampicin | Rifampicin  | 0.78 | TRUE  |  |
| 69011 | 46554 | Rifampicin | Rifampicin  | 0.75 | TRUE  |  |
| 69010 | 46555 | Rifampicin | Rifampicin  | 0.59 | TRUE  |  |
| 69009 | 46556 | Rifampicin | Epinephrine | 0.5  | FALSE |  |
| 69015 | 46557 | Rifampicin | Rifampicin  | 0.44 | TRUE  |  |
| 69011 | 46558 | Rifampicin | RIPE        | 0.87 | FALSE |  |
| 69010 | 46559 | Rifampicin | RIPE        | 0.65 | FALSE |  |

|       |       |             |             |      |       |  |
|-------|-------|-------------|-------------|------|-------|--|
| 69009 | 46560 | Rifampicin  | Epinephrine | 0.58 | FALSE |  |
| 69008 | 46561 | Rifampicin  | Rifampicin  | 0.98 | TRUE  |  |
| 69023 | 46562 | Rifampicin  | Amoxicillin | 0.71 | FALSE |  |
| 69014 | 46563 | Amoxicillin | Ampicillin  | 0.27 | FALSE |  |
| 69020 | 46564 | Amoxicillin | Ampicillin  | 0.88 | FALSE |  |
| 69021 | 46565 | Amoxicillin | Epinephrine | 0.35 | FALSE |  |
| 69023 | 46566 | Amoxicillin | Amoxicillin | 0.94 | TRUE  |  |
| 69014 | 46567 | Amoxicillin | Epinephrine | 0.85 | FALSE |  |
| 69020 | 46568 | Amoxicillin | Epinephrine | 0.72 | FALSE |  |
| 69021 | 46569 | Amoxicillin | Amoxicillin | 0.53 | TRUE  |  |
| 69022 | 46570 | Amoxicillin | Amoxicillin | 0.93 | TRUE  |  |
| 69022 | 46571 | Amoxicillin | Amoxicillin | 0.94 | TRUE  |  |
| 69021 | 46572 | Amoxicillin | Amoxicillin | 0.92 | TRUE  |  |
| 69020 | 46573 | Amoxicillin | Epinephrine | 0.7  | FALSE |  |
| 69014 | 46574 | Amoxicillin | Epinephrine | 0.78 | FALSE |  |
| 69023 | 46575 | Amoxicillin | Amoxicillin | 0.66 | TRUE  |  |
| 69009 | 46576 | Amoxicillin | Amoxicillin | 0.98 | TRUE  |  |
| 69021 | 46577 | Amoxicillin | Amoxicillin | 0.72 | TRUE  |  |
| 69014 | 46578 | Amoxicillin | Amoxicillin | 0.78 | TRUE  |  |
| 69023 | 46579 | Amoxicillin | Amoxicillin | 0.93 | TRUE  |  |
| 69023 | 46580 | Amoxicillin | Amoxicillin | 0.95 | TRUE  |  |
| 69014 | 46581 | Amoxicillin | Epinephrine | 0.35 | FALSE |  |
| 69020 | 46582 | Amoxicillin | Ampicillin  | 0.68 | FALSE |  |
| 69021 | 46583 | Amoxicillin | Amoxicillin | 0.63 | TRUE  |  |
| 69022 | 46584 | Amoxicillin | Amoxicillin | 0.88 | TRUE  |  |
| 69023 | 46585 | Amoxicillin | Amoxicillin | 0.93 | TRUE  |  |
| 69014 | 46586 | Amoxicillin | Epinephrine | 0.44 | FALSE |  |
| 69020 | 46587 | Amoxicillin | Epinephrine | 0.82 | FALSE |  |
| 69021 | 46588 | Amoxicillin | Amoxicillin | 0.46 | TRUE  |  |
| 69021 | 46589 | Amoxicillin | Amoxicillin | 0.96 | TRUE  |  |

|       |       |               |                    |      |       |  |
|-------|-------|---------------|--------------------|------|-------|--|
| 69022 | 46590 | Amoxicillin   | Amoxicillin        | 0.91 | TRUE  |  |
| 69021 | 46591 | Amoxicillin   | Epinephrine        | 0.79 | FALSE |  |
| 69020 | 46592 | Amoxicillin   | Epinephrine        | 0.76 | FALSE |  |
| 69014 | 46593 | Amoxicillin   | Epinephrine        | 0.79 | FALSE |  |
| 69023 | 46594 | Amoxicillin   | Amoxicillin        | 0.5  | TRUE  |  |
| 69022 | 46595 | Amoxicillin   | Amoxicillin        | 0.99 | TRUE  |  |
| 69021 | 46596 | Amoxicillin   | Amoxicillin        | 0.77 | TRUE  |  |
| 69020 | 46597 | Amoxicillin   | Epinephrine        | 0.63 | FALSE |  |
| 69014 | 46598 | Amoxicillin   | Epinephrine        | 0.42 | FALSE |  |
| 69023 | 46599 | Amoxicillin   | Amoxicillin        | 0.83 | TRUE  |  |
| 68983 | 46600 | Ciprofloxacin | Ciprofloxacin      | 0.91 | TRUE  |  |
| 69016 | 46601 | Ciprofloxacin | Ciprofloxacin      | 0.98 | TRUE  |  |
| 69017 | 46602 | Ciprofloxacin | Ciprofloxacin      | 0.9  | TRUE  |  |
| 69018 | 46603 | Ciprofloxacin | Hydroxychloroquine | 0.69 | FALSE |  |
| 69018 | 46606 | Ciprofloxacin | Hydroxychloroquine | 0.75 | FALSE |  |
| 69017 | 46607 | Ciprofloxacin | Ciprofloxacin      | 0.84 | TRUE  |  |
| 69016 | 46608 | Ciprofloxacin | Ciprofloxacin      | 0.95 | TRUE  |  |
| 68983 | 46609 | Ciprofloxacin | Ciprofloxacin      | 0.81 | TRUE  |  |
| 68983 | 46610 | Ciprofloxacin | Ciprofloxacin      | 0.84 | TRUE  |  |
| 69016 | 46611 | Ciprofloxacin | Ciprofloxacin      | 0.77 | TRUE  |  |
| 69017 | 46612 | Ciprofloxacin | Ciprofloxacin      | 0.59 | TRUE  |  |
| 69018 | 46613 | Ciprofloxacin | Hydroxychloroquine | 0.95 | FALSE |  |
| 69018 | 46616 | Ciprofloxacin | Hydroxychloroquine | 0.8  | FALSE |  |
| 69017 | 46617 | Ciprofloxacin | Ciprofloxacin      | 0.75 | TRUE  |  |
| 69016 | 46618 | Ciprofloxacin | Ciprofloxacin      | 0.96 | TRUE  |  |
| 68983 | 46619 | Ciprofloxacin | Ciprofloxacin      | 0.86 | TRUE  |  |
| 68983 | 46620 | Ciprofloxacin | Promethazine HCl   | 0.3  | FALSE |  |
| 69016 | 46621 | Ciprofloxacin | Ciprofloxacin      | 0.97 | TRUE  |  |
| 69017 | 46622 | Ciprofloxacin | Ciprofloxacin      | 0.75 | TRUE  |  |
| 69018 | 46623 | Ciprofloxacin | Hydroxychloroquine | 0.91 | FALSE |  |

|       |       |               |                    |      |       |  |
|-------|-------|---------------|--------------------|------|-------|--|
| 69018 | 46626 | Ciprofloxacin | Hydroxychloroquine | 0.62 | FALSE |  |
| 69017 | 46627 | Ciprofloxacin | Ciprofloxacin      | 0.83 | TRUE  |  |
| 69016 | 46628 | Ciprofloxacin | Ciprofloxacin      | 0.97 | TRUE  |  |
| 68983 | 46629 | Ciprofloxacin | Ciprofloxacin      | 0.56 | TRUE  |  |
| 69018 | 46631 | Ciprofloxacin | Hydroxychloroquine | 0.81 | FALSE |  |
| 69017 | 46632 | Ciprofloxacin | Ciprofloxacin      | 0.79 | TRUE  |  |
| 69016 | 46633 | Ciprofloxacin | Ciprofloxacin      | 0.96 | TRUE  |  |
| 68983 | 46634 | Ciprofloxacin | Ciprofloxacin      | 0.64 | TRUE  |  |
| 68983 | 46635 | Ciprofloxacin | Ciprofloxacin      | 0.76 | TRUE  |  |
| 69016 | 46636 | Ciprofloxacin | Ciprofloxacin      | 0.86 | TRUE  |  |
| 69017 | 46637 | Ciprofloxacin | Ciprofloxacin      | 0.96 | TRUE  |  |
| 69018 | 46638 | Ciprofloxacin | Hydroxychloroquine | 0.76 | FALSE |  |

| data collected June 22 2021. 1cm water |          |     |     |     |     |     |     |     |     |     |     |     |     |     |     |                  |             |          |
|----------------------------------------|----------|-----|-----|-----|-----|-----|-----|-----|-----|-----|-----|-----|-----|-----|-----|------------------|-------------|----------|
| 2.5mm (12 lane PAD)                    |          |     |     |     |     |     |     |     |     |     |     |     |     |     |     |                  |             |          |
| time (s)                               | sqrt t   |     |     |     |     |     |     |     |     |     |     |     |     |     |     | Average Distance | stdev       |          |
| 1                                      | 1        | 0   | 0.1 | 0.2 | 0.2 | 0.2 | 0.2 | 0.2 | 0.1 | 0.1 | 0.1 | 0.1 | 0.1 | 0.1 | 0.1 | 0                | 0.116666667 | 0.071774 |
| 2                                      | 1.414214 | 0.7 | 0.8 | 0.8 | 0.7 | 0.7 | 0.8 | 0.8 | 0.8 | 0.8 | 0.8 | 0.8 | 0.8 | 0.8 | 0.8 | 0.8              | 0.775       | 0.045227 |
| 5                                      | 2.236068 | 1.1 | 1.2 | 1.1 | 1.1 | 1.1 | 1.2 | 1.2 | 1.2 | 1.2 | 1.2 | 1.2 | 1.1 | 1.1 | 1.1 | 1.1              | 1.141666667 | 0.051493 |
| 7                                      | 2.645751 | 1.4 | 1.4 | 1.4 | 1.3 | 1.3 | 1.4 | 1.4 | 1.4 | 1.4 | 1.4 | 1.4 | 1.4 | 1.3 | 1.3 | 1.3              | 1.366666667 | 0.049237 |
| 10                                     | 3.162278 | 1.5 | 1.5 | 1.5 | 1.4 | 1.4 | 1.6 | 1.6 | 1.5 | 1.5 | 1.5 | 1.5 | 1.5 | 1.5 | 1.5 | 1.5              | 1.5         | 0.060302 |
| 15                                     | 3.872983 | 1.8 | 1.9 | 1.8 | 1.8 | 1.8 | 1.8 | 1.8 | 1.9 | 1.8 | 1.8 | 1.8 | 1.9 | 1.9 | 1.9 | 1.9              | 1.841666667 | 0.051493 |
| 20                                     | 4.472136 | 2.1 | 2.2 | 2.1 | 2   | 2.1 | 2.2 | 2.2 | 2.1 | 2.1 | 2.1 | 2.1 | 2.2 | 2.1 | 2.1 | 2.1              | 2.125       | 0.062158 |
| 30                                     | 5.477226 | 2.4 | 2.5 | 2.4 | 2.4 | 2.4 | 2.5 | 2.5 | 2.5 | 2.5 | 2.5 | 2.5 | 2.5 | 2.6 | 2.5 | 2.5              | 2.475       | 0.062158 |
| 40                                     | 6.324555 | 2.8 | 2.9 | 2.8 | 2.8 | 2.8 | 2.8 | 2.8 | 2.8 | 2.8 | 2.8 | 2.8 | 2.8 | 2.9 | 2.9 | 2.9              | 2.825       | 0.045227 |
| 50                                     | 7.071068 | 3.1 | 3.2 | 3.1 | 3   | 3   | 3   | 3   | 3.1 | 3.1 | 3.1 | 3.1 | 3.1 | 3.2 | 3.2 | 3.2              | 3.1         | 0.073855 |
| 60                                     | 7.745967 | 3.4 | 3.4 | 3.3 | 3.3 | 3.3 | 3.3 | 3.3 | 3.3 | 3.3 | 3.3 | 3.3 | 3.4 | 3.5 | 3.5 | 3.5              | 3.358333333 | 0.079296 |
| 70                                     | 8.3666   | 3.6 | 3.6 | 3.5 | 3.5 | 3.5 | 3.5 | 3.5 | 3.5 | 3.5 | 3.6 | 3.6 | 3.7 | 3.7 | 3.7 | 3.7              | 3.566666667 | 0.07785  |
| 80                                     | 8.944272 | 3.8 | 3.8 | 3.7 | 3.7 | 3.7 | 3.7 | 3.7 | 3.7 | 3.7 | 3.7 | 3.7 | 3.8 | 3.9 | 3.9 | 3.9              | 3.758333333 | 0.079296 |
| 90                                     | 9.486833 | 3.9 | 4   | 3.9 | 3.9 | 3.9 | 3.8 | 3.9 | 3.9 | 3.9 | 3.9 | 4   | 4.1 | 4   | 4   | 4                | 3.933333333 | 0.07785  |
| 100                                    | 10       | 4.1 | 4.2 | 4   | 4   | 4   | 4   | 4   | 4   | 4.1 | 4   | 4.2 | 4.3 | 4.2 | 4.2 | 4.2              | 4.091666667 | 0.108362 |
| 110                                    | 10.48809 | 4.3 | 4.3 | 4.2 | 4.2 | 4.2 | 4.2 | 4.2 | 4.3 | 4.3 | 4.3 | 4.4 | 4.5 | 4.4 | 4.4 | 4.4              | 4.3         | 0.095346 |
| 120                                    | 10.95445 | 4.5 | 4.5 | 4.4 | 4.4 | 4.4 | 4.3 | 4.4 | 4.4 | 4.5 | 4.4 | 4.5 | 4.6 | 4.5 | 4.5 | 4.5              | 4.45        | 0.079772 |

June 22, 2021 Ahlstrom 319 on artgraphix adhesive laser cut, stuck to cline transparency film, stuck in 1cm di water with 2 drops blue food coloring, videoed up to 3 minutes

| 2.5mm | time (s) | sqrt t   | distance (lane 1) |     |     |     |     |     |     |     |     |     |     |     |     | Average  |          |
|-------|----------|----------|-------------------|-----|-----|-----|-----|-----|-----|-----|-----|-----|-----|-----|-----|----------|----------|
|       | 1        | 1        | 0                 | 0   | 0   | 0   | 0   | 0   | 0   | 0   | 0   | 0   | 0   | 0   | 0   | 0        | 0        |
|       | 2        | 1.414214 | 0.7               | 0.7 | 0.8 | 0.8 | 0.8 | 0.8 | 0.7 | 0.7 | 0.7 | 0.7 | 0.7 | 0.7 | 0.7 | 0.733333 | 0.049237 |
|       | 5        | 2.236068 | 0.9               | 0.9 | 0.9 | 1   | 1   | 1   | 1   | 0.8 | 0.9 | 0.9 | 0.9 | 0.9 | 0.9 | 0.925    | 0.062158 |
|       | 7        | 2.645751 | 1.3               | 1.2 | 1.3 | 1.4 | 1.4 | 1.4 | 1.4 | 1.3 | 1.4 | 1.4 | 1.4 | 1.3 | 1.4 | 1.35     | 0.06742  |
|       | 10       | 3.162278 | 1.7               | 1.6 | 1.7 | 1.7 | 1.8 | 1.8 | 1.8 | 1.7 | 1.7 | 1.7 | 1.7 | 1.6 | 1.8 | 1.716667 | 0.071774 |
|       | 15       | 3.872983 | 2                 | 1.9 | 2   | 2   | 2.1 | 2   | 2.1 | 1.9 | 2   | 2   | 1.9 | 2   | 2   | 1.991667 | 0.066856 |
|       | 20       | 4.472136 | 2.3               | 2.2 | 2.3 | 2.4 | 2.4 | 2.4 | 2.5 | 2.2 | 2.3 | 2.3 | 2.3 | 2.4 | 2.4 | 2.333333 | 0.088763 |
|       | 30       | 5.477226 | 2.8               | 2.7 | 2.8 | 2.9 | 2.9 | 2.8 | 2.9 | 2.7 | 2.8 | 2.9 | 2.9 | 2.7 | 2.8 | 2.808333 | 0.079296 |
|       | 40       | 6.324555 | 3.2               | 3.1 | 3.2 | 3.3 | 3.4 | 3.3 | 3.4 | 3.1 | 3.2 | 3.3 | 3.1 | 3.3 | 3.3 | 3.241667 | 0.108362 |
|       | 50       | 7.071068 | 3.5               | 3.4 | 3.5 | 3.6 | 3.7 | 3.6 | 3.7 | 3.5 | 3.6 | 3.7 | 3.5 | 3.7 | 3.7 | 3.583333 | 0.102986 |
|       | 60       | 7.745967 | 3.8               | 3.7 | 3.8 | 4   | 4   | 4   | 4   | 3.8 | 3.9 | 4   | 3.8 | 4   | 4   | 3.9      | 0.112815 |
|       | 70       | 8.3666   | 4.1               | 4   | 4.1 | 4.3 | 4.3 | 4.3 | 4.4 | 4.1 | 4.2 | 4.3 | 4   | 4.3 | 4.3 | 4.2      | 0.13484  |
|       | 80       | 8.944272 | 4.3               | 4.3 | 4.4 | 4.5 | 4.5 | 4.5 | 5.6 | 4.4 | 4.5 | 4.5 | 4.3 | 4.5 | 4.5 | 4.525    | 0.34935  |
|       | 90       | 9.486833 | 4.5               | 4.5 | 4.6 | 4.7 | 4.8 | 4.8 | 4.9 | 4.6 | 4.7 | 4.8 | 4.5 | 4.7 | 4.7 | 4.675    | 0.13568  |
|       | 100      | 10       | 4.7               | 4.7 | 4.8 | 4.9 | 5   | 5   | 5.1 | 4.8 | 4.9 | 5   | 4.7 | 4.9 | 4.9 | 4.875    | 0.13568  |
|       | 110      | 10.48809 | 5                 | 4.9 | 5   | 5.2 | 5.2 | 5.2 | 5.2 | 5   | 5.1 | 5.2 | 4.9 | 5.1 | 5.1 | 5.083333 | 0.119342 |
|       | 120      | 10.95445 | 5.2               | 5.2 | 5.2 | 5.5 | 5.5 | 5.5 | 5.5 | 5.2 | 5.3 | 5.4 | 5.1 | 5.4 | 5.4 | 5.333333 | 0.149747 |

videos collected 09.12.2022. Analyzed 09.13.2022. Hydrophobically coated polystyrene "Trycite" obtained from Serim. Alhstrom 319, artgraphix adhesive, laser cut. 1 cm water, 2 drops blue food color

| 2.5mm    |          |        |        |        |        |        |        |        |        |        |         |         |         |              |               |
|----------|----------|--------|--------|--------|--------|--------|--------|--------|--------|--------|---------|---------|---------|--------------|---------------|
| time (s) | sqrt t   | lane 1 | lane 2 | lane 3 | lane 4 | lane 5 | lane 6 | lane 7 | lane 8 | lane 9 | lane 10 | lane 11 | lane 12 | Average      | stdev         |
| 1        | 1        | 0.1    | 0      | 0.1    | 0      | 0      | 0      | 0      | 0      | 0      | 0       | 0       | 0       | 0.0166666667 | 0.03892494721 |
| 2        | 1.414214 | 0.5    | 0.5    | 0.5    | 0.5    | 0.5    | 0.6    | 0.5    | 0.5    | 0.5    | 0.5     | 0.6     | 0.5     | 0.5166666667 | 0.03892494721 |
| 5        | 2.236068 | 1.1    | 1.2    | 1.1    | 1.1    | 1.1    | 1.2    | 1.2    | 1.2    | 1.2    | 1.1     | 1.1     | 1.2     | 1.1          | 1.141666667   |
| 7        | 2.645751 | 1.3    | 1.4    | 1.3    | 1.3    | 1.3    | 1.4    | 1.4    | 1.4    | 1.3    | 1.3     | 1.4     | 1.4     | 1.4          | 1.358333333   |
| 10       | 3.162278 | 1.6    | 1.7    | 1.6    | 1.7    | 1.7    | 1.7    | 1.7    | 1.7    | 1.7    | 1.6     | 1.6     | 1.7     | 1.7          | 1.666666667   |
| 15       | 3.872983 | 2.1    | 2.2    | 2      | 2.1    | 2.1    | 2.2    | 2.2    | 2.2    | 2.2    | 2       | 2.1     | 2.1     | 2.1          | 2.116666667   |
| 20       | 4.472136 | 2.4    | 2.5    | 2.4    | 2.4    | 2.5    | 2.5    | 2.5    | 2.5    | 2.5    | 2.4     | 2.4     | 2.4     | 2.4          | 2.441666667   |
| 30       | 5.477226 | 2.9    | 3      | 2.9    | 3      | 3      | 3      | 3      | 3      | 3      | 2.9     | 2.9     | 2.9     | 2.9          | 2.95          |
| 40       | 6.324555 | 3.3    | 3.4    | 3.3    | 3.4    | 3.4    | 3.4    | 3.4    | 3.4    | 3.4    | 3.3     | 3.3     | 3.3     | 3.35         | 0.05222329679 |
| 50       | 7.071068 | 3.6    | 3.7    | 3.6    | 3.7    | 3.7    | 3.7    | 3.7    | 3.7    | 3.7    | 3.7     | 3.7     | 3.7     | 3.7          | 3.683333333   |
| 60       | 7.745967 | 4      | 4.1    | 4      | 4.1    | 4.1    | 4.1    | 4.1    | 4.1    | 4.1    | 4       | 4       | 4       | 4            | 4.05          |
| 70       | 8.3666   | 4.3    | 4.4    | 4.3    | 4.4    | 4.4    | 4.4    | 4.4    | 4.4    | 4.4    | 4.3     | 4.3     | 4.3     | 4.4          | 4.358333333   |
| 80       | 8.944272 | 4.6    | 4.7    | 4.6    | 4.7    | 4.7    | 4.7    | 4.7    | 4.7    | 4.7    | 4.6     | 4.6     | 4.7     | 4.7          | 4.666666667   |
| 90       | 9.486833 | 4.8    | 4.9    | 4.8    | 4.8    | 4.9    | 4.9    | 4.9    | 4.9    | 4.8    | 4.8     | 4.8     | 4.8     | 4.8          | 4.833333333   |
| 100      | 10       | 5      | 5.2    | 5      | 5.1    | 5.2    | 5.2    | 5.2    | 5.2    | 5.2    | 5       | 5.1     | 5.2     | 5.2          | 5.133333333   |
| 110      | 10.48809 | 5.3    | 5.4    | 5.3    | 5.4    | 5.4    | 5.4    | 5.4    | 5.4    | 5.4    | 5.4     | 5.3     | 5.3     | 5.4          | 5.366666667   |
| 120      | 10.95445 | 5.4    | 5.5    | 5.4    | 5.5    | 5.5    | 5.5    | 5.5    | 5.5    | 5.4    | 5.4     | 5.5     | 5.5     | 5.5          | 5.466666667   |

| Data collected June 22, 2021 |          |               |     |        |        |        |        |        |        |        |        |         |         |         |                  |          |          |
|------------------------------|----------|---------------|-----|--------|--------|--------|--------|--------|--------|--------|--------|---------|---------|---------|------------------|----------|----------|
| 5mm wax                      |          |               |     |        |        |        |        |        |        |        |        |         |         |         |                  |          |          |
| time (s)                     | sqrt t   | distance (cm) | lan | lane 2 | lane 3 | lane 4 | lane 5 | lane 6 | lane 7 | lane 8 | lane 9 | lane 10 | lane 11 | lane 12 | Average Distance | stdev    |          |
| 1                            | 1        | 0             |     | 0      | 0      | 0      | 0      | 0      | 0      | 0      | 0      | 0       | 0       | 0       | 0                | 0        |          |
| 2                            | 1.414214 | 0.7           |     | 0.6    | 0.6    | 0.6    | 0.6    | 0.7    | 0.6    | 0.6    | 0.7    | 0.7     | 0.7     | 0.7     | 0.7              | 0.658333 | 0.051493 |
| 5                            | 2.236068 | 1.3           |     | 1.2    | 1.3    | 1.3    | 1.3    | 1.4    | 1.3    | 1.3    | 1.3    | 1.3     | 1.3     | 1.4     | 1.3              | 1.308333 | 0.051493 |
| 7                            | 2.645751 | 1.5           |     | 1.4    | 1.4    | 1.5    | 1.6    | 1.6    | 1.6    | 1.5    | 1.5    | 1.5     | 1.5     | 1.6     | 1.5              | 1.508333 | 0.066856 |
| 10                           | 3.162278 | 1.8           |     | 1.7    | 1.8    | 1.8    | 1.9    | 1.8    | 1.8    | 1.8    | 1.7    | 1.8     | 1.8     | 1.8     | 1.8              | 1.791667 | 0.051493 |
| 15                           | 3.872983 | 2.2           |     | 2      | 2.1    | 2.1    | 2.2    | 2.2    | 2.2    | 2.2    | 2.2    | 2.1     | 2.1     | 2.2     | 2.2              | 2.15     | 0.06742  |
| 20                           | 4.472136 | 2.4           |     | 2.3    | 2.4    | 2.4    | 2.6    | 2.5    | 2.5    | 2.4    | 2.4    | 2.5     | 2.6     | 2.5     | 2.5              | 2.458333 | 0.090034 |
| 30                           | 5.477226 | 3             |     | 2.8    | 3      | 3      | 3.2    | 3.1    | 3      | 3      | 3      | 2.9     | 3       | 3       | 3                | 3        | 0.095346 |
| 40                           | 6.324555 | 3.4           |     | 3.3    | 3.4    | 3.4    | 3.6    | 3.4    | 3.4    | 3.3    | 3.3    | 3.4     | 3.4     | 3.4     | 3.4              | 3.391667 | 0.079296 |
| 50                           | 7.071068 | 3.8           |     | 3.7    | 3.8    | 3.8    | 3.8    | 4      | 3.8    | 3.8    | 3.8    | 3.7     | 3.8     | 3.8     | 3.8              | 3.8      | 0.073855 |
| 60                           | 7.745967 | 4.1           |     | 4      | 4.2    | 4.1    | 4.3    | 4.2    | 4.2    | 4.1    | 4.1    | 4.1     | 4.1     | 4.1     | 4.1              | 4.133333 | 0.07785  |
| 70                           | 8.3666   | 4.4           |     | 4.3    | 4.4    | 4.4    | 4.6    | 4.4    | 4.4    | 4.4    | 4.3    | 4.4     | 4.4     | 4.4     | 4.4              | 4.4      | 0.073855 |
| 80                           | 8.944272 | 4.6           |     | 4.5    | 4.6    | 4.5    | 4.8    | 4.5    | 4.6    | 4.5    | 4.5    | 4.6     | 4.6     | 4.6     | 4.6              | 4.575    | 0.086603 |
| 90                           | 9.486833 | 5             |     | 4.8    | 5      | 4.9    | 5.2    | 4.9    | 5      | 5      | 4.8    | 4.9     | 5       | 5       | 5                | 4.958333 | 0.108362 |
| 100                          | 10       | 5.2           |     | 5.1    | 5.2    | 5.1    | 5.4    | 5.2    | 5.2    | 5.1    | 5      | 5.1     | 5.2     | 5.2     | 5.2              | 5.166667 | 0.098473 |
| 110                          | 10.48809 | 5.4           |     | 5.3    | 5.4    | 5.4    | 5.6    | 5.5    | 5.5    | 5.4    | 5.3    | 5.4     | 5.5     | 5.5     | 5.5              | 5.433333 | 0.088763 |
| 120                          | 10.95445 | 5.7           |     | 5.5    | 5.6    | 5.5    | 5.8    | 5.6    | 5.6    | 5.5    | 5.5    | 5.5     | 5.6     | 5.6     | 5.6              | 5.583333 | 0.093744 |



June 22, 2021 Ahlstrom 319 on artgraphix adhesive laser cut, stuck to cline transparency film, stuck in 1cm di water with 2 drops blue food coloring, videoed up to 3 minutes

| 5mm      |          |                        |        |        |        |        |        |        |        |         |         |         |         |          | Average  | stdev |
|----------|----------|------------------------|--------|--------|--------|--------|--------|--------|--------|---------|---------|---------|---------|----------|----------|-------|
| time (s) | sqrt t   | distance (lane 1) (cm) | lane 3 | lane 4 | lane 5 | lane 6 | lane 7 | lane 8 | lane 9 | lane 10 | lane 11 | lane 12 | Average | stdev    |          |       |
| 1        | 1        | 0.5                    | 0.5    | 0.5    | 0.5    | 0.5    | 0.6    | 0.5    | 0.5    | 0.5     | 0.5     | 0.5     | 0.5     | 0.508333 | 0.028868 |       |
| 2        | 1.414214 | 0.8                    | 0.8    | 0.8    | 0.8    | 0.8    | 0.8    | 0.7    | 0.8    | 0.8     | 0.8     | 0.8     | 0.9     | 0.8      | 0.04264  |       |
| 5        | 2.236068 | 1.3                    | 1.3    | 1.4    | 1.3    | 1.3    | 1.3    | 1.3    | 1.4    | 1.3     | 1.3     | 1.3     | 1.3     | 1.316667 | 0.038925 |       |
| 7        | 2.645751 | 1.5                    | 1.5    | 1.6    | 1.5    | 1.5    | 1.5    | 1.5    | 1.6    | 1.5     | 1.5     | 1.5     | 1.5     | 1.516667 | 0.038925 |       |
| 10       | 3.162278 | 1.8                    | 1.8    | 1.9    | 1.8    | 1.9    | 1.8    | 1.8    | 1.9    | 1.8     | 1.8     | 1.8     | 1.9     | 1.833333 | 0.049237 |       |
| 15       | 3.872983 | 2.2                    | 2.2    | 2.3    | 2.2    | 2.3    | 2.2    | 2.2    | 2.3    | 2.2     | 2.2     | 2.2     | 2.3     | 2.233333 | 0.049237 |       |
| 20       | 4.472136 | 2.5                    | 2.5    | 2.6    | 2.5    | 2.6    | 2.5    | 2.5    | 2.6    | 2.5     | 2.5     | 2.5     | 2.6     | 2.533333 | 0.049237 |       |
| 30       | 5.477226 | 3                      | 3      | 3.1    | 3      | 3.2    | 3      | 3      | 3.2    | 3.1     | 3       | 3       | 3.1     | 3.058333 | 0.079296 |       |
| 40       | 6.324555 | 3.4                    | 3.5    | 3.6    | 3.5    | 3.6    | 3.5    | 3.4    | 3.5    | 3.6     | 3.5     | 3.4     | 3.5     | 3.5      | 0.073855 |       |
| 50       | 7.071068 | 3.8                    | 3.8    | 4      | 3.9    | 4      | 3.9    | 3.8    | 4      | 3.9     | 3.8     | 3.8     | 3.9     | 3.883333 | 0.083485 |       |
| 60       | 7.745967 | 4.1                    | 4.2    | 4.3    | 4.2    | 4.3    | 4.2    | 4.1    | 4.4    | 4.2     | 4.2     | 4.1     | 4.2     | 4.208333 | 0.090034 |       |
| 70       | 8.3666   | 4.5                    | 4.5    | 4.6    | 4.6    | 4.6    | 4.6    | 4.6    | 4.5    | 4.7     | 4.5     | 4.5     | 4.5     | 4.558333 | 0.066856 |       |
| 80       | 8.944272 | 4.7                    | 4.8    | 4.9    | 4.8    | 4.9    | 4.8    | 4.7    | 4.8    | 4.7     | 4.7     | 4.7     | 4.7     | 4.766667 | 0.07785  |       |
| 90       | 9.486833 | 4.9                    | 5      | 5.1    | 5      | 5.1    | 5.1    | 5      | 5.2    | 5       | 5       | 5       | 5       | 5.033333 | 0.07785  |       |
| 100      | 10       | 5.2                    | 5.3    | 5.4    | 5.3    | 5.4    | 5.3    | 5.2    | 5.4    | 5.3     | 5.2     | 5.2     | 5.2     | 5.283333 | 0.083485 |       |
| 110      | 10.48809 | 5.4                    | 5.5    | 5.6    | 5.5    | 5.6    | 5.5    | 5.4    | 5.6    | 5.5     | 5.4     | 5.4     | 5.4     | 5.483333 | 0.083485 |       |
| 120      | 10.95445 | 5.6                    | 5.7    | 5.8    | 5.7    | 5.8    | 5.7    | 5.6    | 5.8    | 5.7     | 5.6     | 5.6     | 5.6     | 5.683333 | 0.083485 |       |

videos collected 09.12.2022. Analyzed 09.13.2022. Hydrophobically coated polystyrene "Trycrite" obtained from Serim. Alhstrom 319, artgraphix adhesive, laser cut. 1 cm water, 2 drops blue food color

| 5mm      |          |        |        |        |        |        |        |        |        |        |         |         |         |         |                           |
|----------|----------|--------|--------|--------|--------|--------|--------|--------|--------|--------|---------|---------|---------|---------|---------------------------|
| time (s) | sqrt t   | lane 1 | lane 2 | lane 3 | lane 4 | lane 5 | lane 6 | lane 7 | lane 8 | lane 9 | lane 10 | lane 11 | lane 12 | Average | stdev                     |
| 1        | 1        | 0      | 0      | 0      | 0      | 0      | 0      | 0      | 0      | 0      | 0       | 0       | 0       | 0       | 0                         |
| 2        | 1.414214 | 0.5    | 0.4    | 0.5    | 0.5    | 0.4    | 0.3    | 0.4    | 0.4    | 0.4    | 0.4     | 0.4     | 0.4     | 0.5     | 0.425 0.06215815605       |
| 5        | 2.236068 | 1.1    | 1      | 1      | 1      | 1      | 0.9    | 1      | 1      | 1      | 1       | 1       | 1.1     | 1.2     | 1.025 0.07537783614       |
| 7        | 2.645751 | 1.4    | 1.3    | 1.2    | 1.3    | 1.2    | 1.2    | 1.2    | 1.3    | 1.2    | 1.3     | 1.3     | 1.3     | 1.4     | 1.283333333 0.07177405626 |
| 10       | 3.162278 | 1.6    | 1.6    | 1.5    | 1.6    | 1.5    | 1.5    | 1.5    | 1.5    | 1.5    | 1.6     | 1.6     | 1.6     | 1.7     | 1.566666667 0.06513389473 |
| 15       | 3.872983 | 2      | 2      | 2      | 2      | 2      | 1.9    | 1.9    | 2      | 2      | 1.9     | 2       | 2       | 2.1     | 1.983333333 0.05773502692 |
| 20       | 4.472136 | 2.4    | 2.3    | 2.3    | 2.4    | 2.2    | 2.2    | 2.2    | 2.3    | 2.2    | 2.2     | 2.3     | 2.4     | 2.4     | 2.3 0.08528028654         |
| 30       | 5.477226 | 2.8    | 2.7    | 2.7    | 2.8    | 2.7    | 2.7    | 2.7    | 2.8    | 2.7    | 2.7     | 2.8     | 2.8     | 2.9     | 2.758333333 0.06685579234 |
| 40       | 6.324555 | 3.2    | 3.1    | 3.1    | 3.2    | 3      | 3      | 3.2    | 3.1    | 3.1    | 3.1     | 3.1     | 3.2     | 3.3     | 3.133333333 0.08876253646 |
| 50       | 7.071068 | 3.6    | 3.5    | 3.5    | 3.6    | 3.4    | 3.4    | 3.5    | 3.5    | 3.5    | 3.5     | 3.6     | 3.6     | 3.6     | 3.525 0.07537783614       |
| 60       | 7.745967 | 4      | 3.8    | 3.8    | 4      | 3.8    | 3.8    | 3.8    | 3.9    | 3.8    | 3.8     | 3.8     | 3.8     | 3.9     | 3.85 0.07977240352        |
| 70       | 8.3666   | 4.3    | 4.1    | 4.1    | 4.3    | 4      | 4      | 4.2    | 4      | 4      | 4       | 4.1     | 4       | 4.2     | 4.108333333 0.1164500153  |
| 80       | 8.944272 | 4.6    | 4.4    | 4.4    | 4.6    | 4.3    | 4.3    | 4.5    | 4.3    | 4.3    | 4.3     | 4.4     | 4.4     | 4.5     | 4.416666667 0.1114640858  |
| 90       | 9.486833 | 4.8    | 4.7    | 4.7    | 4.8    | 4.6    | 4.6    | 4.5    | 4.7    | 4.6    | 4.6     | 4.7     | 4.6     | 4.7     | 4.666666667 0.08876253646 |
| 100      | 10       | 5      | 4.8    | 4.8    | 5      | 4.8    | 4.8    | 5      | 4.8    | 4.8    | 4.8     | 5       | 4.9     | 5       | 4.891666667 0.09962049199 |
| 110      | 10.48809 | 5.3    | 5      | 5      | 5.4    | 5      | 5      | 5.3    | 5      | 5      | 5       | 5.2     | 5.1     | 5.2     | 5.125 0.1484771179        |
| 120      | 10.95445 | 5.6    | 5.4    | 5.4    | 5.6    | 5.3    | 5.3    | 5.5    | 5.3    | 5.3    | 5.3     | 5.4     | 5.3     | 5.4     | 5.4 0.112815215           |

data collected 11.16.2022. 5mm laser-cut paper lanes, Alhstrom 319. Trycite backing. Tape to within 1 cm of bottom. put in 1cm of blue water.

| Time | Lane 1 | Lane 2 | Lane 3 | Lane 4 | Lane 5 | Lane 6 | Lane 7 | Lane 8 | Lane 9 | Lane 10 | Lane 11 | Lane 12 | average      | stdev         |
|------|--------|--------|--------|--------|--------|--------|--------|--------|--------|---------|---------|---------|--------------|---------------|
| 1    | 0.1    | 0      | 0.1    | 0      | 0.1    | 0      | 0.1    | 0.1    | 0      | 0       | 0       | 0       | 0.0416666667 | 0.05149286505 |
| 2    | 0.4    | 0.4    | 0.4    | 0.4    | 0.5    | 0.4    | 0.4    | 0.4    | 0.3    | 0.3     | 0.3     | 0.4     | 0.3833333333 | 0.05773502692 |
| 5    | 1      | 1.2    | 1.3    | 1.2    | 1.2    | 1      | 1.2    | 1.1    | 1      | 1       | 0.9     | 1       | 1.091666667  | 0.1240112409  |
| 7    | 1.3    | 1.5    | 1.5    | 1.5    | 1.5    | 1.4    | 1.5    | 1.4    | 1.2    | 1.2     | 1.1     | 1.2     | 1.358333333  | 0.1505042031  |
| 10   | 1.6    | 1.9    | 2      | 2      | 2.1    | 2      | 2      | 1.9    | 1.6    | 1.7     | 1.4     | 1.5     | 1.808333333  | 0.2353269808  |
| 15   | 2.1    | 2.4    | 2.5    | 2.6    | 2.6    | 2.5    | 2.4    | 2.3    | 2.1    | 2.2     | 1.8     | 2.1     | 2.3          | 0.2449489743  |
| 20   | 2.5    | 2.8    | 2.9    | 3      | 3      | 3      | 2.7    | 2.8    | 2.6    | 2.6     | 2.1     | 2.5     | 2.708333333  | 0.2678477632  |
| 30   | 3.2    | 3.4    | 3.5    | 3.6    | 3.7    | 3.6    | 3.3    | 3.4    | 3.2    | 3.3     | 2.8     | 3.3     | 3.358333333  | 0.2391588796  |
| 40   | 3.7    | 4      | 4.1    | 4.2    | 4.3    | 4.3    | 4      | 4      | 4.8    | 3.9     | 3.3     | 4       | 4.05         | 0.3605551275  |
| 50   | 4.2    | 4.5    | 4.6    | 4.7    | 4.8    | 4.8    | 4.4    | 4.4    | 4.3    | 4.4     | 3.8     | 4.6     | 4.458333333  | 0.2810963385  |
| 60   | 4.6    | 4.8    | 5      | 5.1    | 5.2    | 5.3    | 4.7    | 4.7    | 4.6    | 4.8     | 4.1     | 5       | 4.825        | 0.3250874008  |
| 70   | 5.1    | 5.2    | 5.4    | 5.5    | 5.5    | 5.6    | 5.2    | 5.1    | 5      | 5.1     | 4.5     | 5.5     | 5.225        | 0.3048844789  |
| 80   | 5.4    | 5.5    | 5.7    | 5.8    | 5.9    | 6      | 5.5    | 5.4    | 5.3    | 5.4     | 4.9     | 5.8     | 5.55         | 0.3060005942  |
| 90   | 5.7    | 5.7    | 6      | 6.2    | 6.2    | 6.2    | 5.7    | 5.7    | 5.6    | 5.7     | 5.2     | 6.1     | 5.833333333  | 0.3084663923  |
| 100  | 6.1    | 6      | 6.3    | 6.4    | 6.5    | 6.5    | 6      | 6      | 5.9    | 6       | 5.4     | 6.4     | 6.125        | 0.3165869118  |
| 110  | 6.4    | 6.3    | 6.5    | 6.7    | 6.7    | 6.7    | 6.3    | 6.3    | 6.1    | 6.2     | 5.6     | 6.6     | 6.366666667  | 0.3171845844  |

video taken 12.16.22, analyzed 12.17.22  
unlaminated 0.2in roll-to-roll

| Time | sqrt time   | lane 1 | lane 2 | lane 3 | lane 4 | lane 5 | lane 6 | lane 7 | lane 8 | lane 9 | lane 10 | lane 11 | lane 12 | Average (cm) | stdev         |
|------|-------------|--------|--------|--------|--------|--------|--------|--------|--------|--------|---------|---------|---------|--------------|---------------|
| 1    | 1           | 0      | 0      | 0      | 0.1    | 0.1    | 0.1    | 0.2    | 0.2    | 0.2    | 0.3     | 0.4     | 0.4     | 0.166666667  | 0.1435481125  |
| 2    | 1.414213562 | 0.5    | 0.5    | 0.6    | 0.6    | 0.6    | 0.7    | 0.6    | 0.7    | 0.8    | 0.8     | 0.9     | 0.8     | 0.675        | 0.1288057029  |
| 5    | 2.236067977 | 1      | 1.1    | 1.1    | 1.2    | 1.2    | 1.3    | 1.2    | 1.1    | 1.3    | 1.3     | 1.4     | 1.3     | 1.208333333  | 0.1164500153  |
| 7    | 2.645751311 | 1.3    | 1.3    | 1.4    | 1.4    | 1.4    | 1.4    | 1.4    | 1.4    | 1.4    | 1.5     | 1.4     | 1.6     | 1.5          | 1.416666667   |
| 10   | 3.16227766  | 1.5    | 1.5    | 1.6    | 1.7    | 1.6    | 1.5    | 1.5    | 1.6    | 1.7    | 1.7     | 1.8     | 1.6     | 1.608333333  | 0.09962049199 |
| 15   | 3.872983346 | 2      | 2      | 2      | 2.2    | 2      | 2      | 2      | 2      | 2.1    | 2.2     | 2.2     | 2.3     | 2.1          | 2.075         |
| 20   | 4.472135955 | 2.3    | 2.3    | 2.4    | 2.5    | 2.3    | 2.3    | 2.3    | 2.4    | 2.4    | 2.4     | 2.5     | 2.6     | 2.4          | 2.391666667   |
| 30   | 5.477225575 | 2.8    | 2.7    | 2.8    | 3.2    | 2.8    | 2.7    | 2.8    | 2.8    | 2.8    | 2.9     | 3       | 3       | 2.9          | 2.866666667   |
| 40   | 6.32455532  | 3.3    | 3.2    | 3.3    | 3.5    | 3.2    | 3.2    | 3.2    | 3.3    | 3.4    | 3.4     | 3.5     | 3.5     | 3.3          | 3.316666667   |
| 50   | 7.071067812 | 3.7    | 3.6    | 3.7    | 3.8    | 3.6    | 3.6    | 3.6    | 3.5    | 3.7    | 3.7     | 3.8     | 3.8     | 3.7          | 3.683333333   |
| 60   | 7.745966692 | 3.9    | 3.8    | 3.9    | 4      | 3.8    | 3.9    | 3.8    | 4      | 4      | 4       | 4.2     | 4       | 4            | 3.941666667   |
| 70   | 8.366600265 | 4.3    | 4.2    | 4.3    | 4.4    | 4.1    | 4.2    | 4.1    | 4.3    | 4.4    | 4.4     | 4.4     | 4.4     | 4.2          | 4.275         |
| 80   | 8.94427191  | 4.5    | 4.4    | 4.4    | 4.6    | 5.5    | 5.5    | 5.4    | 4.5    | 4.6    | 4.7     | 4.7     | 4.5     | 4.775        | 0.4287932326  |
| 90   | 9.486832981 | 4.7    | 4.6    | 4.7    | 4.8    | 4.6    | 4.6    | 4.6    | 4.8    | 4.8    | 4.8     | 4.9     | 4.9     | 4.7          | 4.725         |
| 100  | 10          | 5      | 4.8    | 4.9    | 5      | 4.8    | 4.9    | 4.8    | 5      | 5.2    | 5.2     | 5.2     | 5       | 4.983333333  | 0.1527525232  |
| 110  | 10.48808848 | 5.3    | 5.1    | 5.2    | 5.4    | 5      | 5.1    | 5      | 5.3    | 5.3    | 5.4     | 5.4     | 5.2     | 5.225        | 0.1484771179  |
| 120  | 10.95445115 | 5.4    | 5.2    | 5.4    | 5.5    | 5.2    | 5.3    | 5.3    | 5.5    | 5.5    | 5.6     | 5.7     | 5.6     | 5.433333333  | 0.161432977   |

video taken 12.16.22, analyzed 12.17.22  
laminated 0.2in roll-to-roll

| Time | sqrt time   | lane 1 | lane 2 | lane 3 | lane 4 | lane 5 | lane 6 | lane 7 | lane 8 | lane 9 | lane 10 | lane 11 | lane 12 | average (cm) | stdev         |
|------|-------------|--------|--------|--------|--------|--------|--------|--------|--------|--------|---------|---------|---------|--------------|---------------|
| 1    | 1           | 0      | 0      | 0      | 0      | 0      | 0      | 0.1    | 0.1    | 0.1    | 0.2     | 0.2     | 0.2     | 0.075        | 0.08660254038 |
| 2    | 1.414213562 | 0.4    | 0.5    | 0.5    | 0.5    | 0.5    | 0.5    | 0.6    | 0.6    | 0.6    | 0.6     | 0.7     | 0.5     | 1.4          | 0.6083333333  |
| 5    | 2.236067977 | 1.6    | 1.6    | 1.6    | 1.5    | 1.4    | 1.3    | 1.5    | 1.4    | 1.4    | 1.5     | 1.5     | 1.5     | 2.2          | 1.541666667   |
| 7    | 2.645751311 | 2.1    | 1.9    | 1.8    | 1.7    | 1.7    | 1.6    | 1.8    | 1.7    | 1.8    | 1.8     | 1.8     | 1.7     | 2.4          | 1.833333333   |
| 10   | 3.16227766  | 2.4    | 2.2    | 2.1    | 2      | 2.2    | 2      | 2.3    | 2      | 2      | 2.1     | 2.3     | 2.6     | 2.183333333  | 0.1898963034  |
| 15   | 3.872983346 | 2.9    | 2.6    | 2.5    | 2.5    | 2.5    | 2.4    | 2.7    | 2.4    | 2.4    | 2.5     | 2.5     | 2.7     | 3.1          | 2.6           |
| 20   | 4.472135955 | 3.3    | 2.9    | 2.8    | 2.8    | 2.9    | 2.7    | 3      | 2.7    | 2.7    | 2.7     | 3       | 3.4     | 2.908333333  | 0.2353269808  |
| 30   | 5.477225575 | 3.7    | 3.4    | 3.3    | 3.3    | 3.5    | 3.4    | 3.7    | 3.3    | 3.3    | 3.4     | 3.4     | 3.6     | 3.9          | 3.491666667   |
| 40   | 6.32455532  | 4.3    | 3.8    | 3.7    | 3.8    | 3.9    | 3.8    | 4.4    | 3.6    | 3.7    | 3.8     | 4       | 4.4     | 3.933333333  | 0.2806917861  |
| 50   | 7.071067812 | 4.7    | 4.1    | 4      | 4.1    | 4.4    | 4.3    | 4.9    | 4      | 4.2    | 4.2     | 4.2     | 4.4     | 4.8          | 4.341666667   |
| 60   | 7.745966692 | 5.2    | 4.4    | 4.3    | 4.4    | 4.6    | 4.6    | 5.4    | 4.3    | 4.4    | 4.4     | 4.9     | 5.2     | 4.675        | 0.3957156922  |
| 70   | 8.366600265 | 5.5    | 4.7    | 4.6    | 4.6    | 5      | 5      | 5.7    | 4.5    | 5.7    | 4.7     | 5.2     | 5.4     | 5.05         | 0.4421024151  |
| 80   | 8.94427191  | 5.8    | 5      | 4.9    | 5      | 5.4    | 5.4    | 6.2    | 4.9    | 5      | 5       | 5.4     | 5.7     | 5.308333333  | 0.4187825067  |
| 90   | 9.486832981 | 6.1    | 5.3    | 5.2    | 5.3    | 5.6    | 5.6    | 6.4    | 5.1    | 5.4    | 5.4     | 5.7     | 6       | 5.591666667  | 0.3964807305  |
| 100  | 10          | 6.4    | 5.5    | 5.4    | 5.5    | 5.9    | 5.9    | 6.7    | 5.4    | 5.6    | 5.5     | 5.9     | 6.3     | 5.833333333  | 0.4334498678  |

| data collected June 22, 2021 |          |     |     |     |     |     |     |     |     |     |     |     |     |     |          |                  |          |
|------------------------------|----------|-----|-----|-----|-----|-----|-----|-----|-----|-----|-----|-----|-----|-----|----------|------------------|----------|
| 7.5mm wax                    |          |     |     |     |     |     |     |     |     |     |     |     |     |     |          |                  |          |
| time (s)                     | sqrt t   |     |     |     |     |     |     |     |     |     |     |     |     |     |          | Average Distance | stdev    |
| 1                            | 1        | 0   | 0   | 0   | 0   | 0   | 0   | 0   | 0   | 0   | 0   | 0   | 0   | 0   | 0        | 0                | 0        |
| 2                            | 1.414214 | 0.8 | 0.7 | 0.7 | 0.7 | 0.7 | 0.7 | 0.7 | 0.7 | 0.7 | 0.7 | 0.7 | 0.7 | 0.7 | 0.7      | 0.708333         | 0.028868 |
| 5                            | 2.236068 | 1.2 | 1.2 | 1.1 | 1.2 | 1.2 | 1.2 | 1.1 | 1.2 | 1.2 | 1.2 | 1.2 | 1.2 | 1.1 | 1.175    | 0.045227         |          |
| 7                            | 2.645751 | 1.5 | 1.4 | 1.4 | 1.5 | 1.5 | 1.4 | 1.5 | 1.5 | 1.5 | 1.5 | 1.5 | 1.4 | 1.4 | 1.458333 | 0.051493         |          |
| 10                           | 3.162278 | 1.7 | 1.7 | 1.6 | 1.7 | 1.7 | 1.7 | 1.7 | 1.7 | 1.7 | 1.7 | 1.6 | 1.6 | 1.6 | 1.666667 | 0.049237         |          |
| 15                           | 3.872983 | 2.2 | 2.1 | 2   | 2.1 | 2.1 | 2   | 2   | 2.1 | 2.1 | 2.1 | 2   | 2   | 2.1 | 2.066667 | 0.065134         |          |
| 20                           | 4.472136 | 2.4 | 2.4 | 2.4 | 2.4 | 2.4 | 2.4 | 2.4 | 2.4 | 2.5 | 2.4 | 2.4 | 2.4 | 2.4 | 2.408333 | 0.028868         |          |
| 30                           | 5.477226 | 3   | 2.9 | 2.9 | 2.9 | 3   | 2.9 | 2.9 | 2.9 | 2.9 | 3   | 2.9 | 2.9 | 3   | 2.933333 | 0.049237         |          |
| 40                           | 6.324555 | 3.4 | 3.4 | 3.3 | 3.4 | 3.4 | 3.3 | 3.3 | 3.4 | 3.5 | 3.4 | 3.3 | 3.4 | 3.4 | 3.375    | 0.062158         |          |
| 50                           | 7.071068 | 3.7 | 3.7 | 3.6 | 3.7 | 3.8 | 3.6 | 3.7 | 3.7 | 3.7 | 3.8 | 3.7 | 3.6 | 3.7 | 3.691667 | 0.066856         |          |
| 60                           | 7.745967 | 4   | 4   | 3.9 | 4   | 4.1 | 4   | 4   | 4.1 | 4.2 | 4   | 3.9 | 4   | 4   | 4.016667 | 0.083485         |          |
| 70                           | 8.3666   | 4.3 | 4.3 | 4.2 | 4.3 | 4.4 | 4.3 | 4.2 | 4.3 | 4.5 | 4.3 | 4.2 | 4.3 | 4.3 | 4.3      | 0.08528          |          |
| 80                           | 8.944272 | 4.5 | 4.5 | 4.4 | 4.5 | 4.6 | 4.7 | 4.6 | 4.6 | 4.6 | 4.7 | 4.5 | 4.4 | 4.4 | 4.55     | 0.1              |          |
| 90                           | 9.486833 | 4.7 | 4.7 | 4.7 | 4.8 | 4.8 | 4.8 | 4.9 | 4.9 | 4.9 | 5   | 4.8 | 4.7 | 4.8 | 4.8      | 0.095346         |          |
| 100                          | 10       | 5   | 5   | 4.9 | 5   | 5   | 5   | 5   | 5   | 5.1 | 5.2 | 5   | 4.9 | 5   | 5.008333 | 0.079296         |          |
| 110                          | 10.48809 | 5.3 | 5.3 | 5.2 | 5.3 | 5.3 | 5.2 | 5.2 | 5.3 | 5.5 | 5.2 | 5.3 | 5.3 | 5.3 | 5.283333 | 0.083485         |          |
| 120                          | 10.95445 | 5.4 | 5.4 | 5.3 | 5.4 | 5.4 | 5.4 | 5.4 | 5.5 | 5.6 | 5.4 | 5.3 | 5.5 | 5.5 | 5.416667 | 0.083485         |          |

June 22, 2021 Ahlstrom 319 on artgraphix adhesive laser cut, stuck to cline transparency film, stuck in 1cm di water with 2 drops blue food coloring, videoed up to 3 minutes

7.5mm transparency

| time (s) | sqrt t   | distance (lane 1) |     |     |     |     |     |     |     |     |     |     |     |          | Average  | stdev    |
|----------|----------|-------------------|-----|-----|-----|-----|-----|-----|-----|-----|-----|-----|-----|----------|----------|----------|
| 1        | 1        | 0                 | 0   | 0   | 0   | 0   | 0   | 0   | 0.7 | 0.7 | 0.6 | 0.6 | 0.6 | 0.5      | 0.308333 | 0.326018 |
| 2        | 1.414214 | 0.7               | 0.7 | 0.7 | 0.7 | 0.8 | 0.7 | 0.9 | 0.8 | 0.8 | 0.8 | 0.8 | 0.7 | 0.7      | 0.75     | 0.06742  |
| 5        | 2.236068 | 1.3               | 1.3 | 1.3 | 1.3 | 1.4 | 1.4 | 1.4 | 1.4 | 1.3 | 1.2 | 1.2 | 1.1 | 1.3      | 0.095346 |          |
| 7        | 2.645751 | 1.6               | 1.6 | 1.6 | 1.6 | 1.7 | 1.6 | 1.6 | 1.6 | 1.6 | 1.5 | 1.5 | 1.4 | 1.575    | 0.075378 |          |
| 10       | 3.162278 | 1.9               | 1.9 | 1.9 | 1.9 | 2   | 1.9 | 1.9 | 1.8 | 1.8 | 1.7 | 1.7 | 1.6 | 1.833333 | 0.11547  |          |
| 15       | 3.872983 | 2.3               | 2.3 | 2.3 | 2.3 | 2.4 | 2.3 | 2.3 | 2.3 | 2.2 | 2.2 | 2.1 | 2   | 2.25     | 0.108711 |          |
| 20       | 4.472136 | 2.6               | 2.5 | 2.5 | 2.6 | 2.7 | 2.6 | 2.6 | 2.7 | 2.5 | 2.6 | 2.5 | 2.4 | 2.566667 | 0.088763 |          |
| 30       | 5.477226 | 3.2               | 3.1 | 3.1 | 3.2 | 3.3 | 3.1 | 3.2 | 3.2 | 3   | 3   | 3   | 2.8 | 3.1      | 0.13484  |          |
| 40       | 6.324555 | 3.6               | 3.6 | 3.6 | 3.7 | 3.8 | 3.6 | 3.6 | 3.6 | 3.5 | 3.5 | 3.4 | 3.3 | 3.566667 | 0.130268 |          |
| 50       | 7.071068 | 4                 | 3.9 | 3.9 | 4   | 4.1 | 3.9 | 4   | 4   | 3.9 | 3.9 | 3.8 | 3.6 | 3.916667 | 0.12673  |          |
| 60       | 7.745967 | 4.4               | 4.3 | 4.3 | 4.4 | 4.5 | 4.3 | 4.3 | 4.3 | 4.2 | 4.3 | 4.1 | 3.9 | 4.275    | 0.154479 |          |
| 70       | 8.3666   | 4.6               | 4.6 | 4.6 | 4.7 | 4.8 | 4.6 | 4.7 | 4.7 | 4.5 | 4.6 | 4.4 | 4.3 | 4.591667 | 0.137895 |          |
| 80       | 8.944272 | 4.9               | 4.8 | 4.8 | 5   | 5.1 | 4.8 | 5   | 5   | 4.8 | 4.9 | 4.7 | 4.6 | 4.866667 | 0.143548 |          |
| 90       | 9.486833 | 5.2               | 5.1 | 5.1 | 5.3 | 5.3 | 5.1 | 5.2 | 5.2 | 5.1 | 5.2 | 5   | 4.8 | 5.133333 | 0.137069 |          |
| 100      | 10       | 5.4               | 5.4 | 5.4 | 5.5 | 5.6 | 5.4 | 5.4 | 5.4 | 5.3 | 5.4 | 5.2 | 5   | 5.366667 | 0.149747 |          |
| 110      | 10.48809 | 5.7               | 5.6 | 5.6 | 5.8 | 5.8 | 5.5 | 5.7 | 5.7 | 5.5 | 5.6 | 5.5 | 5.3 | 5.608333 | 0.144338 |          |
| 120      | 10.95445 | 5.9               | 5.9 | 5.9 | 6   | 6   | 5.8 | 5.9 | 5.9 | 5.8 | 5.9 | 5.7 | 5.5 | 5.85     | 0.13817  |          |

videos collected 09.12.2022. Analyzed 09.13.2022. Hydrophobically coated polystyrene "Trycite" obtained from Serim. Alhstrom 319, artgraphix adhesive, laser cut. 1 cm water, 2 drops blue food color

| 7.5mm trycite |          |        |        |        |        |        |        |        |        |        |         |         |         |         |              |               |
|---------------|----------|--------|--------|--------|--------|--------|--------|--------|--------|--------|---------|---------|---------|---------|--------------|---------------|
| time (s)      | sqrt t   | lane 1 | lane 2 | lane 3 | lane 4 | lane 5 | lane 6 | lane 7 | lane 8 | lane 9 | lane 10 | lane 11 | lane 12 | Average | stdev        |               |
| 1             | 1        | 0.2    | 0.2    | 0.2    | 0.2    | 0.1    | 0.2    | 0.2    | 0.2    | 0.1    | 0.2     | 0.2     | 0.2     | 0.2     | 0.1833333333 | 0.03892494721 |
| 2             | 1.414214 | 0.7    | 0.7    | 0.6    | 0.6    | 0.6    | 0.6    | 0.6    | 0.6    | 0.6    | 0.6     | 0.6     | 0.7     | 0.7     | 0.6333333333 | 0.04923659639 |
| 5             | 2.236068 | 1.3    | 1.3    | 1.2    | 1.2    | 1.2    | 1.3    | 1.2    | 1.2    | 1.2    | 1.2     | 1.3     | 1.3     | 1.3     | 1.241666667  | 0.05149286505 |
| 7             | 2.645751 | 1.5    | 1.5    | 1.4    | 1.4    | 1.4    | 1.5    | 1.4    | 1.4    | 1.4    | 1.3     | 1.4     | 1.5     | 1.5     | 1.4333333333 | 0.06513389473 |
| 10            | 3.162278 | 1.7    | 1.6    | 1.6    | 1.6    | 1.7    | 1.7    | 1.7    | 1.7    | 1.7    | 1.7     | 1.8     | 1.8     | 1.8     | 1.7          | 0.07385489459 |
| 15            | 3.872983 | 2.2    | 2.1    | 2      | 2      | 2      | 2.1    | 2      | 2      | 2      | 2       | 2       | 2.1     | 2.2     | 2.0583333333 | 0.07929614611 |
| 20            | 4.472136 | 2.5    | 2.5    | 2.4    | 2.4    | 2.4    | 2.4    | 2.4    | 2.4    | 2.3    | 2.4     | 2.4     | 2.4     | 2.5     | 2.416666667  | 0.05773502692 |
| 30            | 5.477226 | 2.9    | 2.9    | 2.8    | 2.8    | 2.9    | 2.9    | 2.8    | 2.8    | 2.8    | 2.9     | 2.9     | 3       | 3       | 2.8833333333 | 0.07177405626 |
| 40            | 6.324555 | 3.4    | 3.4    | 3.3    | 3.4    | 3.4    | 3.4    | 3.3    | 3.3    | 3.3    | 3.3     | 3.2     | 3.3     | 3.4     | 3.341666667  | 0.06685579234 |
| 50            | 7.071068 | 3.7    | 3.7    | 3.6    | 3.6    | 3.7    | 3.7    | 3.6    | 3.6    | 3.6    | 3.6     | 3.7     | 3.7     | 3.8     | 3.666666667  | 0.06513389473 |
| 60            | 7.745967 | 4      | 4      | 3.9    | 4      | 4      | 4      | 4      | 4      | 4      | 3.9     | 4       | 4       | 4.1     | 3.991666667  | 0.05149286505 |
| 70            | 8.3666   | 4.4    | 4.4    | 4.2    | 4.3    | 4.4    | 4.4    | 4.3    | 4.3    | 4.3    | 4.2     | 4.3     | 4.4     | 4.4     | 4.3333333333 | 0.07784989442 |
| 80            | 8.944272 | 4.7    | 4.7    | 4.5    | 4.6    | 4.7    | 4.6    | 4.6    | 4.5    | 4.5    | 4.5     | 4.6     | 4.6     | 4.7     | 4.6083333333 | 0.07929614611 |
| 90            | 9.486833 | 4.9    | 4.9    | 4.8    | 4.8    | 4.9    | 4.9    | 4.8    | 4.7    | 4.7    | 4.7     | 4.8     | 4.8     | 4.9     | 4.825        | 0.07537783614 |
| 100           | 10       | 5.1    | 5.1    | 4.9    | 5      | 5.1    | 5.1    | 5      | 5      | 5      | 4.9     | 5       | 5       | 5.2     | 5.0333333333 | 0.08876253646 |
| 110           | 10.48809 | 5.3    | 5.4    | 5.2    | 5.3    | 5.4    | 5.4    | 5.4    | 5.3    | 5.2    | 5.2     | 5.3     | 5.3     | 5.4     | 5.316666667  | 0.08348471099 |
| 120           | 10.95445 | 5.5    | 5.5    | 5.4    | 5.5    | 5.5    | 5.5    | 5.5    | 5.5    | 5.4    | 5.4     | 5.5     | 5.5     | 5.5     | 5.475        | 0.04522670169 |
